1 Estimation of Full-Length TprK Diversity in *Treponema pallidum* subspecies *pallidum*

2

3 Amin Addetia<sup>1</sup>, Michelle Lin<sup>1</sup>, Quynh Phung<sup>1</sup>, Hong Xie<sup>1</sup>, Meei-Li Huang<sup>1</sup>, Giulia

4 Ciccarese<sup>2</sup>, Ivano Dal Conte<sup>3</sup>, Marco Cusini<sup>4</sup>, Francesco Drago<sup>2</sup>, Lorenzo Giacani<sup>5</sup>,

5 Alexander L. Greninger<sup>1\*</sup>

6

7 <sup>1</sup>Department of Laboratory Medicine, University of Washington, Seattle, Washington,

8 USA

9 <sup>2</sup>Health Sciences Department, Section of Dermatology, San Martino University Hospital,

10 Genoa, Italy

11 <sup>3</sup>STI Clinic, Infectious Diseases Unit, University of Turin, Turin, Italy

12 <sup>4</sup>Fondazione IRCCS Ca' Granda, Ospedale Maggiore Policlinico, Milan, Italy

13 <sup>5</sup>Department of Medicine, University of Washington, Seattle, Washington, USA

14

15

16 **Key words:** *Treponema pallidum*, syphilis, TprK, antigenic variation, outer membrane  
17 protein, immune evasion.

18 **Short title:** *tprK* deep-sequencing profiling

19 \*Address correspondence to Alexander L. Greninger, [agrening@uw.edu](mailto:agrening@uw.edu)

20

21

## 22 **Abstract**

23 Immune evasion and disease progression of *Treponema pallidum* subspecies *pallidum*  
24 are associated with sequence diversity in the hypervariable, putative outer membrane  
25 protein TprK. Previous attempts to study variation within TprK have sequenced at  
26 depths insufficient to fully appreciate the hypervariable nature of the protein, failed to  
27 establish linkage between the protein's 7 variable regions, or were conducted on strains  
28 passed through rabbits. As a consequence, a complete profiling of *tprK* during infection  
29 in the human host is still lacking. Furthermore, prior studies examining how *T. pallidum*  
30 uses its repertoire of genomic donor sites to generate diversity within the V regions of  
31 the *tprK* also yielded a partial understanding of this process, due to the limited number  
32 of *tprK* alleles examined. In this study, we used short- and long-read deep sequencing  
33 to directly characterize full-length *tprK* alleles from *T. pallidum* collected from early  
34 lesions of patients attending two STD clinics in Italy. Our data, combined with recent  
35 data available on Chinese *T. pallidum* strains, show the near complete absence of  
36 overlap in TprK sequences among the 41 strains profiled to date. Moreover, our data  
37 allowed us to redefine the boundaries of *tprK* V regions, identify 55 donor sites, and  
38 estimate the total number of TprK variants that *T. pallidum* can potentially generate.  
39 Altogether, our results support how *T. pallidum* TprK antigenic variation system is an  
40 unsurmountable obstacle for the human immune system to naturally achieve infection  
41 eradication, and reiterate the importance of this mechanism for pathogen persistence in  
42 the host.

43

## 44 **Importance**

45 Syphilis continues to be a significant public health issue in both low- and high-income  
46 nations, including the United States, where the number of infectious syphilis cases has  
47 increased dramatically over the past five years. *T. pallidum*, the causative agent of  
48 syphilis, encodes an outer membrane protein TprK that undergoes segmental gene  
49 conversion to constantly create new sequences. We performed deep TprK profiling to  
50 understand full-length TprK diversity in *T. pallidum*-positive clinical specimens and  
51 compared these to all samples for which TprK deep sequencing is available. We found  
52 almost no overlap in TprK sequences between different patients. We further estimate  
53 that the total baseline junctional diversity of full-length TprK rivals that of current  
54 estimates of the human adaptive immune system. These data underscore the  
55 immunoevasive ability of TprK that allows *T. pallidum* to establish lifelong infection.

56

57

## 58 **Introduction**

59           Syphilis, caused by the spirochete *Treponema pallidum* subspecies *pallidum* (*T.*  
60 *pallidum*), is a significant global health problem. Although most syphilis cases occur in  
61 low-income countries, where the disease is endemic, rates of syphilis infection have  
62 been steadily increasing for the last two decades in high-income nations, particularly in  
63 men who have sex with men (MSM) and HIV-infected individuals [1–4]. Syphilis is an  
64 acute and chronic sexually transmitted infection marked by distinct early and late stages  
65 [5]. These stages are generally distinguished by unique clinical manifestations with  
66 symptoms associated with the late stage developing up to several decades after initial  
67 infection and following a long period of disease latency [6].

68           The mechanisms that allow *T. pallidum* to persist for the lifetime of an infected  
69 individual are not fully understood. During natural and experimental syphilis infection, a  
70 robust host immune response is developed against *T. pallidum* [7]. This suggests  
71 immune evasion strategies developed by *T. pallidum* are a key aspect of its  
72 pathogenesis [8].

73           The ability of *T. pallidum* to evade the host immune response is attributed to the  
74 organism's scarcity of surface-exposed outer membrane proteins (OMPs), very slow  
75 generation time (~33h), and the ability to stochastically and rapidly switch on and off  
76 expression of genes encoding putative OMPs through phase variation [9]. Chief among  
77 the immune evasion strategies evolved by *T. pallidum* is its ability to generate diversity  
78 within the putative OMP TprK [10–12]. TprK harbors seven discrete variable (V) regions,  
79 V1-V7. In the putative TprK beta-barrel structure, each variable region is predicted to  
80 form a loop exposed at the host-pathogen interface [13]. Generation of variants in these

81 V regions occurs through non-reciprocal segmental gene conversion, a process in  
82 which sections from donor sites flanking the *tprD* gene (*tp0117*) are stitched together to  
83 create new sequences [14,15]. Forty-seven putative donor sites have been identified  
84 thus far [15], however, the total number of unique TprK sequences that can be  
85 generated in a *T. pallidum* strain has yet to be determined.

86 Gene conversion results in significant intra- and inter-strain diversity of the TprK  
87 protein [16,17,14,18,19]. In rabbit models, diversity in TprK actively accumulates over  
88 the course of an infection and appears to be driven by the host's immune response  
89 [20,21]. At least five of the variable regions, V2 and V4-V7, of TprK elicit an antibody  
90 response in rabbit models [22]. These antibodies are specific for a single variable  
91 sequence [22], which further supports that generation of new V region sequences  
92 allows *T. pallidum* to evade the host response. Furthermore, increased diversity of TprK  
93 is directly correlated with more advanced stages of syphilis [19,23]. In both rabbit  
94 models and humans, *T. pallidum* strains isolated from cases of secondary/disseminated  
95 syphilis contained more TprK diversity than those isolated from cases of primary syphilis  
96 [19,23].

97 Previous studies to evaluate TprK variability within *T. pallidum* strains have  
98 sequenced a limited number of TprK clones, failed to resolve linkage between  
99 variable regions, or been conducted on strains passed through rabbits [16,18–20] [24].  
100 As a result, no studies to date have adequately profiled TprK within *T. pallidum* during  
101 natural infection in the human host. Furthermore, understanding of how different donor  
102 sites contribute to variable region sequences has been hindered by the analysis using a  
103 limited number of *tprK* clones [25]. In this study, we used short- and long-read deep

104 sequencing to directly characterize full-length TprK genes amplified from *T. pallidum*  
105 collected from early genital or anal lesions of 13 individuals attending two STD clinics in  
106 Milan and Turin, Italy [26]. We then combine our data with recent short-read *tprK*  
107 sequencing data from 28 *T. pallidum* strains from collected in China to illustrate the near  
108 complete lack of overlap in TprK sequences among all 41 clinical strains directly and  
109 deeply profiled to date. Additionally, our data help to redefine the TprK variable regions  
110 and to provide an estimate of the number of TprK variants that *T. pallidum* can  
111 potentially generate with its repertoire of donor cassettes. Overall, our data reiterate the  
112 pivotal importance of the TprK antigenic variation system to allow *T. pallidum*  
113 persistence in the host during infection.

114

## 115 **Methods**

### 116 *Sample collection*

117 Swabs from genital or anal lesions were collected from syphilis patients attending  
118 the Dermatology Clinics of the University of Turin and the Ospedale Maggiore in Milan  
119 from approximately December 2016 to March 2017. The only exclusion criterion for  
120 sample collection was an existing record of antibiotic therapy initiated within 30 days  
121 from the patient visit. For sample collection, whenever possible, the lesion area was  
122 gently squeezed to imbibe the swabs with exudate. The swabs were then placed in  
123 sterile microcentrifuge tubes containing 1 ml of 1X lysis buffer (10 mM Tris-HCl, 0.1 M  
124 ethylenediaminetetraacetic acid, and 0.5% sodium dodecyl-sulfate) suitable for DNA  
125 extraction. The swab shafts were then cut to leave the swab in the buffer. Samples were  
126 kept frozen at -80°C until DNA extraction. Sample collection was authorized by the

127 Human Subject Committee of each collecting institution (Protocol code:  
128 PR033REG2016 for the University of Turin, and Protocol Code TREPO2016 for the  
129 University of Milan) and informed consent was obtained from each patient. Specimens  
130 were then sent as de-identified samples in dry ice to the University of Washington for  
131 DNA extraction. The University of Washington Institutional Review Board determined  
132 this investigation not to be human subject research. Patient demographics were also  
133 collected as well as information on sexual orientation, HIV status, syphilis stage and  
134 serology results (VDRL/RPR and TPHA/TPPA) at the time of patient visit.

135

#### 136 *DNA extraction and strain typing*

137 Frozen samples were thawed at room temperature and vortexed before  
138 processing. DNA was extracted from 200  $\mu$ l of sample suspension using the QIAamp  
139 DNA mini kit (Qiagen, Valencia, CA) according to the manufacturer's instructions. DNA  
140 was resuspended in 100  $\mu$ l of elution buffer provided with the kit. Successful DNA  
141 extraction was checked by amplification of a fragment of the human  $\beta$ -globin gene  
142 (Sense primer 5'-CAA CTT CAT CCA CGT TCA CC-3', Antisense primer 5'- GAA GAG  
143 CCA AGG ACA GGT A-3'; expected size: 268 bp). Amplifications were performed in a  
144 50  $\mu$ l final volume using 5  $\mu$ l of DNA template and 2.5 units of GoTaq polymerase  
145 (Promega, Madison, WI). Final concentrations of  $MgCl_2$ , dNTPs, and each primer were  
146 1.5 mM, 200  $\mu$ M, and 0.32  $\mu$ M, respectively. Cycling conditions were initial denaturation  
147 at 95°C for 4 minutes, followed 95°C for 1 min, 60°C for 1 min and 72°C for 1 min for a  
148 total of 40 cycles. Final extension was at 72°C for 5 min.

149

150 *Quantification of Treponemal Load within Patient Samples*

151 The treponemal load of each sample was measured by qPCR as previously described  
152 [24]. Briefly, a portion of *tp47* was amplified using 14.33  $\mu$ L of 2x QuantiTect multiplex  
153 PCR mix, 0.65  $\mu$ L of 2x QuantiTect multiplex PCR mix with ROX, 0.03 unit of UNG and  
154 the following primers 5'-CAA GTA CGA GGG GAA CAT CGA T-3' and 5'-TGA TCG  
155 CTG ACA AGC TTA GG-3'. Amplification was monitored with the following probe: 5'-  
156 FAM-CGG AGA CTC TGA TGG ATG CTG CAG TT-NFQMGB-3'. The following  
157 conditions were used for the qPCR reaction: 50°C for 2 minutes, 95°C for 15 minutes,  
158 and 45 cycles of 94°C for 1 minute and 60°C for 1 minute.

159

160 *Direct from sample amplification and next-generation sequencing of tprK*

161 PCR amplification of *tprK* was conducted using previously described conditions [24] and  
162 *tprK*-specific primers appended to 16 bp Pacbio barcodes (Table S1). The resulting  
163 1.7kb product was cleaned using 0.6x volumes of AMPure XP beads (Beckman-  
164 Coulter). For long-read sequencing, library construction and sequencing on a Sequel I  
165 SMRT Cell 1M with a 10-hour movie were completed by the University of Washington  
166 PacBio Sequencing Services. A minimum of 5,224 PacBio reads were obtained for each  
167 of the samples. Short-read libraries from the same full-length amplicons were  
168 constructed with the Nextera XT kit (Illumina), cleaned with 0.6x volumes of AMPure XP  
169 beads (Beckman-Coulter), and sequenced on 1x192 bp Illumina MiSeq runs. A  
170 minimum of 101,000 Illumina sequencing reads, corresponding to a minimum mean  
171 coverage of 6,672x, were obtained for each sample. Sequencing metadata is available  
172 in Table S2.



173

## 174 *Sequencing analysis*

175        Analysis of *tprK* was performed using custom python/R scripts available on  
176 GitHub ([https://github.com/greninger-lab/tprK\\_diversity](https://github.com/greninger-lab/tprK_diversity)). For the Italian samples,  
177 because of the tagmentation-based library preparation, we quality- (Q20) and adapter-  
178 trimmed Illumina reads using trimmomatic v0.38. PacBio Q20 CCS reads between  
179 1400-1800 bp were trimmed of PCR primers using the dada2 preprocessing pipeline  
180 and denoised using RAD [27,28]. Previously published short-read tiling sequencing data  
181 for *tprK* from 14 primary and 14 secondary syphilis infections in adults from Xiamen  
182 University was downloaded from the NCBI Sequence Read Archive [29,30]. Because of  
183 the tiling PCR library design followed by 2x300bp, both paired-end reads were used in  
184 analysis of the Xiamen samples after adapter trimming using the same options as  
185 above. Variable regions were extracted from all samples using fuzzy regular expression  
186 matching using 18bp of neighboring conserved sequence with up to a 3bp mismatch.  
187 Because of the slight differences in coverage, we required a minimum of 5 reads of  
188 support for a given variable region amino acid sequence from the Xiamen samples,  
189 while for the Italian samples we used a minimum of 10 reads. We additionally included  
190 short-read sequencing data from 2 *T. pallidum* strains passaged in rabbits, which we  
191 profiled in a previous investigation [24], in our analysis. Similar to the Italian strains, we  
192 required each unique identified variable region sequence in these strains to be  
193 supported by a minimum of 10 sequencing reads and present at or above a frequency  
194 of 0.2%.

195 For full-length TprK phylogenetic analysis, we removed any TprK sequences that  
196 contained stop codons or which failed to fuzzy match a 20 amino acid region (allowing 3  
197 mismatches) in any conserved region abutting a variable region, which we found was  
198 indicative of two frame shifts in consecutive variable regions in two TprK sequences.  
199 We also removed any full-length TprK sequences that comprised <0.2% of sequences  
200 present in a given sample for the purposes of display.

201 We used blastn with exact matching over a word size of 10 – our estimate of the  
202 smallest, high-confidence contribution of a donor site – to identify potential donor sites  
203 within a 17.2kb locus containing the *tprD* gene. We limited the number of potential  
204 contributions of each donor site to a variable region to three by restricting the maximum  
205 high scoring pairs (-max\_hsp 3). We used the subject\_besthit option to force non-  
206 overlapping HSPs. In order to generate a list of high-confidence donor sites and reduce  
207 putative false positives due to the smaller word size and to control for potential  
208 sequencing error, we only used variable regions with greater than 50 reads of support  
209 and 0.2% frequency (within-sample) and also required donor sites to be used in  
210 recovered *tprK* variable region sequences in at least 2 separate samples.

211 Shannon diversity scores for each sample were calculated using the R package  
212 VEGAN [31]. Differences in the number of variable region sequences and diversity  
213 scores for strains stratified by host factors were assessed using the Wilcoxon Rank-  
214 Sum test.

215

216 *Data availability*

217 Illumina and PacBio reads from *tprK* sequencing of the samples used in this study are  
218 available under the NCBI BioProject number PRJNA589065.

219

## 220 **Results**

### 221 *Italian patient metadata*

222 We selected 13 *T. pallidum* strains collected from syphilis patients, comprising 7  
223 primary and 6 secondary syphilis cases, in Milan and Turin, Italy (Table 1, Table S3). All  
224 patients reported to be MSM and the median age of individuals was 39 years (range 20-  
225 57 years). Eight of the individuals sampled were HIV positive and, for nine of the  
226 patients, this was the first syphilis diagnosis. Seven of the specimens were collected  
227 from genital lesions, while the remaining six were collected from anal lesions.

228

### 229 *T. pallidum DNA quantitation from clinical specimens*

230 We first assessed the impact of the amount of treponemal DNA input into our  
231 initial PCR reaction on our ability to detect diversity within the 7 variable regions of *tprK*.  
232 For 3 strains, we compared inputs of 1,000 copies of treponemal DNA to the maximum  
233 possible input for our *tprK* PCR amplification reaction. Additionally, we performed a  
234 technical replicate using the same copy number input for another strain. For strains  
235 AS10, AS11, and AS12, the maximum input for *tprK* PCR was 5,362, 2,736, 6,663  
236 copies of treponemal DNA. For strain AS18, we repeated the *tprK* PCR with 1,013  
237 copies of treponemal DNA. The number of identified variants and the diversity  
238 measures for each variable region were similar despite the varying inputs (Table S4,

239 Figure S1). For our subsequent analyses, we normalized the input for the initial *tprK*  
240 amplification to 1,000 treponemal copies for each sample.

241

#### 242 *TprK diversity in T. pallidum strains directly sampled from humans*

243 We used short-read sequencing to examine the diversity within the seven V  
244 regions of TprK and required each identified amino acid sequence from an isolate to be  
245 supported by a minimum of 10 sequencing reads and present at a relative frequency  
246 greater than or equal to 0.2%. We identified a median of 65 (range: 37-162) unique  
247 sequences from all seven V regions from our 13 *T. pallidum* strains. Across the 13  
248 strains, V1 contained the overall fewest unique sequences (median: 4, range: 1-7) and,  
249 as determined by the Shannon diversity index, was the least diverse variable region  
250 (median: 0.119, range: 0-0.836). V6 contained the greatest number of unique variants  
251 (median: 20; range: 3-65) and was also the most diverse variable region (median:  
252 1.603; range: 0.363-2.760) (Table S5).

253 We next examined the diversity of TprK in the context of different clinical  
254 characteristics. *T. pallidum* strains collected from cases of secondary syphilis contained  
255 significantly more unique variable region sequences ( $p=0.004$ ) and were significantly  
256 more diverse ( $p=0.002$ ) than those strains collected from cases of primary syphilis  
257 (Table 2). The number of unique sequences did not significantly differ ( $p=0.174$ )  
258 between strains collected from anal or genital lesions. However, strains collected from  
259 anal lesions exhibited significantly more diversity ( $p=0.035$ ) across the seven V regions.  
260 No significant differences were observed in the number of unique variants or diversity

261 when stratified by HIV status of the patient ( $p=0.187$ ;  $p=0.171$ ) or history of prior *T.*  
262 *pallidum* infection ( $p=0.537$ ;  $p=0.711$ ).

263 In a previous investigation, we profiled TprK in two *T. pallidum* strains collected  
264 from a single patient and amplified by two passages of strains in New Zealand white  
265 rabbits [24]. To assess the impact of the additional passage through rabbits on TprK, we  
266 compared the number of unique variants and diversity across the seven V regions  
267 identified from the 13 Italian *T. pallidum* strains and our two previously profiled strains.  
268 Strains passed through rabbits contained a greater number of variable region  
269 sequences (median 177.5 vs. 65,  $p=0.051$ ) and greater diversity across the seven  
270 variable regions (median 12.1 vs. 4.2,  $p=0.076$ ) compared to those directly sequences  
271 from clinical samples, though these differences were not significant given the few rabbit  
272 strains previously sampled.

273 To ensure accurate estimation of variable regions in both unlinked and linked  
274 analyses, we compared results from both short-read (Illumina) and long-read (PacBio)  
275 sequencing of all *tprK* amplicons generated in this study. The variable region allele  
276 percentages as measured by short-read and long-read sequencing were highly  
277 correlated (median  $r^2 = 0.995$ , range 0.974-1.00) (Figure S2), illustrating the high quality  
278 of modern long-read sequencing. PacBio sequencing exhibited an overall positive bias  
279 in variable region allele percentage compared to Illumina sequencing with an average  
280 linear regression slope of 1.029 (range 1.011-1.092), likely due to clustering during read  
281 denoising and post-filtering.

282 Using our long read data, we recovered a total of 634 full-length TprKs across  
283 the 13 samples, ranging from 26-95 different full-length TprKs within each sample at  $\geq$

284 0.2% frequency. The most prevalent TprK in each sample was generally located near  
285 the root of the TprK phylogenetic tree for that particular sample (Figure 1). We found  
286 that only 3 full-length TprK sequences were shared among the 634 TprK sequences  
287 recovered from all 13 patients after removing sequences at a frequency of <0.2% within  
288 each sample. Two of these overlapping TprK sequences comprised the most common  
289 sequences in at least one of the samples. For example, the most common full-length  
290 TprK sequence in AS12 comprised 72.5% of TprK sequences present in that sample  
291 and was also present at 3.2% of TprK sequences in MI01. Likewise, a TprK comprising  
292 53.0% of sequences present in MI06 was also present in 0.3% of MI04 TprK  
293 sequences.

294

#### 295 *Comparison of TprK diversity between Italian and Chinese strains*

296 We next examined whether the TprK V region sequences present in our 13  
297 Italian individuals shared any overlap with TprK sequences derived from short-read  
298 sequencing of 28 primary and secondary syphilis specimens recently reported from  
299 China [29,30]. Given the extraordinary diversity present in this gene, for print display,  
300 we filtered out any variable sequences constituting <20% of the species present in a  
301 given sample (Figure 3). More complex data filtered with a minimum frequency of 1% is  
302 displayed in an interactive figure in Supplemental File 1.

303 The heatmap shows the impressive diversity present across the TprK variable  
304 regions. V1 and V4 were the most conserved (Figure 2). The same two V1 sequences  
305 comprised the highest frequency species present in 9/13 (69.3%) Italian specimens and  
306 16/28 (57.1%) Chinese specimens. Only 12 majority V4 sequences were present across

307 the 41 specimens. However, the most common V4 sequence present in the Chinese  
308 samples was only represented once in the Italian cohort and even then it was not the  
309 major species present.

310 V3, V5, V6, and V7 regions demonstrated almost no overlap among the 41  
311 specimens (Figure 2). Only 6 of 39 major V7 sequences were shared between any  
312 Italian and any Chinese specimen. No shared V6 sequences were seen among any  
313 samples as the majority species present for each sample.

314

### 315 *Redefining conserved and variable regions in tprK*

316 The sequences we mined from variable regions were initially based off of prior  
317 definitions of the conserved and variable portions of *tprK*, which themselves were based  
318 off comparatively few *tprK* sequences [25]. While identifying donor sites, we noticed  
319 systematic biases in variable region sequence lengths mined from sequencing reads  
320 and the total blastn HSP length (Figure S3A/B and reflected in Figure 2). For instance,  
321 >98% V3 region sequences started with the same 23 bp sequence (5'-  
322 TCATACTCACCTTAGCCCCGACA-3'), and all other sequences had a Levenshtein edit  
323 distance of 1 from this sequence, suggesting this sequence may mark a conserved  
324 portion of *tprK*. Similarly, 100% of V5 region sequences started with the same 13 bp  
325 sequence (5'-AATATAGGCAGCA-3') and no V5 sequence had less than 13 bp  
326 difference in sequence and blast hit length. For V2, 99.3% of sequences began with the  
327 same 14 bp sequence (5'-AGTATGGATTGGGG-3') and the lone alternative sequence  
328 could be explained by low-frequency Illumina sequencing error associated with G-  
329 quadruplexes [32]. Removal of these sequences improved the ability to align *tprD* donor

330 sites across the length of *tprK* variable region sequences, leaving a 4 nucleotide  
331 common sequence (5'-CCTA-3') in V4 region sequences that we left based on its short  
332 nature (Figure S3C/D).

333

### 334 *Contribution of donor sites to variable regions*

335 We next examined how each variable region sequence was generated from  
336 different donor sites using data from all 41 samples. We found a total of 55 donor sites,  
337 corresponding to 5 for V1, 5 for V2, 13 for V3, 5 for V4, 6 for V5, 14 for V6, and 7 for V7  
338 (Figure 3A). Forty-seven sites were previously reported by Centurion et al. [25]. There  
339 was considerable overlap between the two sets, suggesting a finite limit to the number  
340 of donor sites for *tprK*. Of note, two donor sites in the *tprD* locus (VS1-15, VS2-21) had  
341 single nucleotide variants compared to our reference sequence but exactly matched  
342 their previously deposited *tprD* locus (AY587909.1) [25], indicating that chromosomal  
343 mutations in donor sites can affect *tprK* variable region sequences. The vast majority of  
344 the donor sites found in this analysis, 51/55, were clustered downstream of *tprD*, while  
345 the remaining 4 donor sites were located upstream of *tprD*. Notably, all 51 of the donor  
346 sites located downstream of *tprD* were in the same orientation as *tprD* and had the  
347 highest utilization, while the 4 sites upstream of *tprD* faced in the opposite orientation.  
348 Donor sites for specific variable regions were collocated together, such as V1-V4-V5,  
349 V2-V7, and V3-V6. V3-V6 donor sites were almost uniformly derived from overlapping  
350 sequences (Figure 3B). Donor sites for V1 and V4 were the shortest, measuring an  
351 average of 39.2 and 34.8 nucleotides, while V5 and V7 donor sites were the longest at  
352 58.5 and 64.7 nucleotides (Figure 3C).



353

354 *Estimate of total potential diversity of tprK*

355       Using this new inventory of *tprK* donor sites flanking the *tprD* gene, we next  
356 estimated the total coding diversity of TprK. Assuming a simple model in which only one  
357 donor site contributes to each variable region sequence, the 55 *tprD* donor sites across  
358 7 variable regions could combine to create a total of 955,500 different full-length TprK  
359 sequences assuming no mutation. However, multiple donor sites can contribute material  
360 to the same *tprK* variable region to create a mosaic variable region. Our manual review  
361 of donor site contributions to variable regions suggested that donor sites were limited to  
362 three separate contributions to create mosaic variable regions, so we set a limit of three  
363 for the number of high scoring pairs in our blastn analysis of donor sites against each  
364 variable region sequence. The plurality of V1 region sequences only had one donor site  
365 contribute sequence while no V3 or V7 sequences were generated from only one donor  
366 site (Figure 4A). However, all variable regions had the potential for three donor site  
367 contributions. Adding up all potential combinations of one, two, and three-segment  
368 gene conversions that generate different sequences (assuming no single-segment V3  
369 and V7 sequences) and assuming independence between variable regions leads to a  
370 potential diversity of TprK of  $2.69 \times 10^{18}$  full-length protein sequences if donor sites are  
371 reused, or  $1.11 \times 10^{17}$  protein sequences without reuse (Table S5).

372       We next examined whether certain donor sites were not represented in specific  
373 sections of a given variable region. Consistent with the segment usage data in Figure 4,  
374 we found biases in donor site contribution in every variable region. For instance, every  
375 V4 sequence starts with contributions from the same donor site and only two of five total

376 V1 donor sites contribute to the third segment in V1, when using high-confidence  
377 variable region sequences (present in more than 50 reads and >0.2% within sample  
378 frequency). In addition, V3 and V6 variable regions make use of almost all of their donor  
379 sites in both the second and third segments, but less than half of potential donor sites in  
380 the first segment. Taking into account differential use of donor sites by variable region  
381 segment reduced total potential total diversity to  $1.23 \times 10^{15}$  full-length TprK sequences  
382 with replacement, or  $7.95 \times 10^{13}$  sequences without replacement. Across 1544 individual  
383 high-confidence variable region sequences, we found 146 variable region sequences  
384 that used the same donor site more than once in the same variable region sequence,  
385 indicating that some donor site reuse is allowed in the generation of *tprK* variable  
386 regions.

387

## 388 **Discussion**

389 Here we combine deep, full-length profiling of TprK from *T. pallidum*-positive  
390 patient specimens with data-mining of additional TprK short-read sequencing from 28  
391 Chinese patients to explore the diversity of the consummate *T. pallidum* immunoevasion  
392 protein TprK. We find exceedingly little overlap within specific variable regions within  
393 and between each patient cohort. Only 3 of 634 high-quality, full-length TprK sequences  
394 were shared among any samples in the 13 patients on which we performed long-read  
395 sequencing. Consistent with previous reports, we found greater TprK diversity to be  
396 associated with secondary syphilis compared to primary syphilis [29,33]. We then used  
397 this dataset of TprK diversity to find additional donor sites and to begin to piece together  
398 the grammar of variable region generation.

399           Based on the lexicon of *tprK* donor sites measured using deep sequencing  
400 across 41 samples, we estimate a potential full-length TprK combinatorial diversity  
401 approaching  $10^{14} - 10^{18}$  proteins, assuming independence across donor sites. These  
402 estimates may be overestimates if our assumption of independence between variable  
403 region sequences is incorrect. These estimates may also underestimate the total  
404 diversity potential of TprK due to varying lengths of donor site contributions to variable  
405 regions. Most importantly, this junctional diversity is similar to if not greater than  
406 measures of the human adaptive immune system [34–36].

407           Our data also provide insights into differences in measured diversity among  
408 different variable regions. The limited diversity in V1 is associated with higher use of  
409 single-segment gene conversions to generate the variable region, while the limited  
410 diversity in V4 is associated with biased positional usage of different donor sites. Using  
411 the same or similar numbers of overall donor sites, V2 and V5 are able to generate 2-9  
412 times more possible diversity than V1 and V4, which is reflected in direct sequencing  
413 measurements. This increase in diversity generation is due to either less positional bias  
414 of donor sites or greater proportions of three-segment donor site contributions, or both.

415           Of note, we measured fewer than 100 full-length TprKs present in any given  
416 sample using our filtering criteria, which is substantially less than our theoretical  
417 diversity estimates. Though we demonstrated that increasing our PCR template to the  
418 maximum allowed per reaction did not greatly affect variable region diversity  
419 measurements, these measured estimates could be biased by the limited copy numbers  
420 (<10,000 copies) available for *T. pallidum* positive clinical specimens and the limited  
421 range of copy numbers tested in our study.

422 Our work was chiefly limited by the few numbers of clinical samples and *T.*  
423 *pallidum* strains that have been deeply profiled for TprK diversity. Here, we profiled 13  
424 new *T. pallidum* positive clinical specimens and combined them with 28 previously  
425 sequenced samples. However, given the considerable coding potential of TprK, 41  
426 specimens is far too little to understand its overall coding diversity. Because of the  
427 limited number of total variable regions sampled across these 41 samples ( $\sim 10^3$ ) versus  
428 the potential diversity, we considered ourselves underpowered to examine linkages or  
429 epistasis between different variable regions. Future work will have to examine whether  
430 certain variable region sequences segregate together within a given TprK. The sampling  
431 requirements to determine that association are likely quite considerable and beyond the  
432 scope of the work presented here.

433 In addition to our limited understanding of how TprK variable regions interact with  
434 each other, our work here also does not fully inform how TprK interacts with the immune  
435 system. As the overall coding diversity of specific variable regions is somewhat limited,  
436 it is possible that epistatic interactions between variable regions could influence epitope  
437 structure. Certainly, the paucity of variation across the 41 samples in the V4 region is  
438 surprising given that anti-V4 antibodies have been detected in humans [37]. We also  
439 note the lower number of measured V3 diversity could be associated with a lack of  
440 immunological pressure, especially considering its number of potential donor sites and  
441 three-segment gene conversions [37]. Also, if there were not epistatic interactions  
442 between variable regions, it is not necessarily clear why seven different variable regions  
443 with broad but distinct coding potentials would be required in TprK. Alternatively, if there  
444 is no or limited epistasis between variable regions and cross-protective antibody is

445 generated against individual variable regions, the diversity generating potential of  
446 individual variable regions combined with the rate of gene conversion could put an  
447 upward bound on the time period before *T. pallidum* becomes latent in humans.

448 In summary, our work provides a basis for one mechanism of how *T. pallidum*  
449 maintains lifelong infection, through the constant generation of TprK diversity using a  
450 lexicon that approaches that of the baseline human adaptive immune system.

451 Therapeutic interventions that target mechanisms of TprK diversity generation may  
452 prove beneficial. We further hypothesize that loss of the TprK diversity generation will  
453 be one of the first changes associated with longitudinal passage of *T. pallidum* in the  
454 new *in vitro* culture system that provides it respite from constant immune selection.

455

## 456 **References**

- 457 1. Patton ME, Su JR, Nelson R, Weinstock H, Centers for Disease Control and  
458 Prevention (CDC). Primary and secondary syphilis--United States, 2005-2013.  
459 MMWR Morb Mortal Wkly Rep. 2014;63: 402–406.
- 460 2. Centers for Disease Control and Prevention. Syphilis Surveillance Supplement  
461 2013–2017. Atlanta, U.S.: Department of Health and Human Services; 2019.
- 462 3. Stamm LV. Syphilis: Re-emergence of an old foe. Microb Cell. 2016;3: 363–370.  
463 doi:10.15698/mic2016.09.523
- 464 4. Doherty L. Syphilis: old problem, new strategy. BMJ. 2002;325: 153–156.  
465 doi:10.1136/bmj.325.7356.153
- 466 5. Centers for Disease Control and Prevention (CDC). Primary and secondary  
467 syphilis--United States, 1997. MMWR Morb Mortal Wkly Rep. 1998;47: 493–497.
- 468 6. Singh AE, Romanowski B. Syphilis: review with emphasis on clinical,  
469 epidemiologic, and some biologic features. Clin Microbiol Rev. 1999;12: 187–209.
- 470 7. Salazar JC, Hazlett KRO, Radolf JD. The immune response to infection with  
471 *Treponema pallidum*, the stealth pathogen. Microbes Infect. 2002;4: 1133–1140.  
472 doi:10.1016/s1286-4579(02)01638-6
- 473 8. Cruz AR, Ramirez LG, Zuluaga AV, Pillay A, Abreu C, Valencia CA, et al. Immune  
474 Evasion and Recognition of the Syphilis Spirochete in Blood and Skin of Secondary  
475 Syphilis Patients: Two Immunologically Distinct Compartments. PLoS Negl Trop  
476 Dis. 2012;6. doi:10.1371/journal.pntd.0001717
- 477 9. Giacani L, Brandt SL, Ke W, Reid TB, Molini BJ, Iverson-Cabral S, et al.  
478 Transcription of TP0126, *Treponema pallidum* putative OmpW homolog, is  
479 regulated by the length of a homopolymeric guanosine repeat. Infect Immun.  
480 2015;83: 2275–2289. doi:10.1128/IAI.00360-15
- 481 10. LaFond RE, Lukehart SA. Biological Basis for Syphilis. Clinical Microbiology  
482 Reviews. 2006;19: 29–49. doi:10.1128/CMR.19.1.29-49.2006
- 483 11. Cameron CE, Lukehart SA. Current status of syphilis vaccine development: need,  
484 challenges, prospects. Vaccine. 2014;32: 1602–1609.  
485 doi:10.1016/j.vaccine.2013.09.053
- 486 12. Centurion-Lara A, Castro C, Barrett L, Cameron C, Mostowfi M, Van Voorhis WC,  
487 et al. *Treponema pallidum* major sheath protein homologue Tpr K is a target of  
488 opsonic antibody and the protective immune response. J Exp Med. 1999;189: 647–  
489 656.

- 490 13. Centurion-Lara A, Giacani L, Godornes C, Molini BJ, Brinck Reid T, Lukehart SA.  
491 Fine analysis of genetic diversity of the tpr gene family among treponemal species,  
492 subspecies and strains. PLoS Negl Trop Dis. 2013;7: e2222.  
493 doi:10.1371/journal.pntd.0002222
- 494 14. Giacani L, Brandt SL, Puray-Chavez M, Reid TB, Godornes C, Molini BJ, et al.  
495 Comparative investigation of the genomic regions involved in antigenic variation of  
496 the TprK antigen among treponemal species, subspecies, and strains. J Bacteriol.  
497 2012;194: 4208–4225. doi:10.1128/JB.00863-12
- 498 15. Centurion-Lara A, LaFond RE, Hevner K, Godornes C, Molini BJ, Van Voorhis WC,  
499 et al. Gene conversion: a mechanism for generation of heterogeneity in the tprK  
500 gene of *Treponema pallidum* during infection: tprK gene conversion. Molecular  
501 Microbiology. 2004;52: 1579–1596. doi:10.1111/j.1365-2958.2004.04086.x
- 502 16. Stamm LV, Bergen HL. The sequence-variable, single-copy tprK gene of  
503 *Treponema pallidum* Nichols strain UNC and Street strain 14 encodes  
504 heterogeneous TprK proteins. Infect Immun. 2000;68: 6482–6486.
- 505 17. LaFond RE, Centurion-Lara A, Godornes C, Rompalo AM, Van Voorhis WC,  
506 Lukehart SA. Sequence Diversity of *Treponema pallidum* subsp. *pallidum* tprK in  
507 Human Syphilis Lesions and Rabbit-Propagated Isolates. Journal of Bacteriology.  
508 2003;185: 6262–6268. doi:10.1128/JB.185.21.6262-6268.2003
- 509 18. Liu D, Tong M-L, Luo X, Liu L-L, Lin L-R, Zhang H-L, et al. Profile of the tprK gene  
510 in primary syphilis patients based on next-generation sequencing. Picardeau M,  
511 editor. PLOS Neglected Tropical Diseases. 2019;13: e0006855.  
512 doi:10.1371/journal.pntd.0006855
- 513 19. Liu D, Tong M-L, Lin Y, Liu L-L, Lin L-R, Yang T-C. Insights into the genetic  
514 variation profile of tprK in *Treponema pallidum* during the development of natural  
515 human syphilis infection. Giacani L, editor. PLoS Negl Trop Dis. 2019;13:  
516 e0007621. doi:10.1371/journal.pntd.0007621
- 517 20. LaFond RE, Centurion-Lara A, Godornes C, Van Voorhis WC, Lukehart SA. TprK  
518 Sequence Diversity Accumulates during Infection of Rabbits with *Treponema*  
519 *pallidum* subsp. *pallidum* Nichols Strain. Infection and Immunity. 2006;74: 1896–  
520 1906. doi:10.1128/IAI.74.3.1896-1906.2006
- 521 21. Giacani L, Molini BJ, Kim EY, Godornes BC, Leader BT, Tantaló LC, et al.  
522 Antigenic Variation in *Treponema pallidum*: TprK Sequence Diversity Accumulates  
523 in Response to Immune Pressure during Experimental Syphilis. The Journal of  
524 Immunology. 2010;184: 3822–3829. doi:10.4049/jimmunol.0902788
- 525 22. LaFond RE, Molini BJ, Van Voorhis WC, Lukehart SA. Antigenic Variation of TprK  
526 V Regions Abrogates Specific Antibody Binding in Syphilis. Infection and Immunity.  
527 2006;74: 6244–6251. doi:10.1128/IAI.00827-06

- 528 23. Reid TB, Molini BJ, Fernandez MC, Lukehart SA. Antigenic Variation of TprK  
529 Facilitates Development of Secondary Syphilis. Morrison RP, editor. *Infect Immun.*  
530 2014;82: 4959–4967. doi:10.1128/IAI.02236-14
- 531 24. Addetia A, Tantalò LC, Lin MJ, Xie H, Huang M-L, Marra CM, et al. Comparative  
532 Genomics and Full-Length TprK Profiling of *Treponema pallidum* subsp. *pallidum*  
533 Reinfection. *bioRxiv.* 2019; 841395. doi:10.1101/841395
- 534 25. Centurion-Lara A, LaFond RE, Hevner K, Godornes C, Molini BJ, Van Voorhis WC,  
535 et al. Gene conversion: a mechanism for generation of heterogeneity in the *tprK*  
536 gene of *Treponema pallidum* during infection. *Mol Microbiol.* 2004;52: 1579–96.  
537 doi:10.1111/j.1365-2958.2004.04086.x
- 538 26. Giacani L, Ciccarese G, Puga-Salazar C, Dal Conte I, Colli L, Cusini M, et al.  
539 Enhanced Molecular Typing of *Treponema pallidum* subspecies *pallidum* Strains  
540 From 4 Italian Hospitals Shows Geographical Differences in Strain Type  
541 Heterogeneity, Widespread Resistance to Macrolides, and Lack of Mutations  
542 Associated With Doxycycline Resistance. *Sex Transm Dis.* 2018;45: 237–242.  
543 doi:10.1097/OLQ.0000000000000741
- 544 27. Kumar V, Vollbrecht T, Chernyshev M, Mohan S, Hanst B, Bavafa N, et al. Long-  
545 read amplicon denoising. *Nucleic Acids Res.* 2019;47: e104–e104.  
546 doi:10.1093/nar/gkz657
- 547 28. Callahan BJ, McMurdie PJ, Rosen MJ, Han AW, Johnson AJA, Holmes SP.  
548 DADA2: High-resolution sample inference from Illumina amplicon data. *Nature*  
549 *Methods.* 2016;13: 581–583. doi:10.1038/nmeth.3869
- 550 29. Liu D, Tong M-L, Lin Y, Liu L-L, Lin L-R, Yang T-C. Insights into the genetic  
551 variation profile of *tprK* in *Treponema pallidum* during the development of natural  
552 human syphilis infection. *PLOS Neglected Tropical Diseases.* 2019;13: e0007621.  
553 doi:10.1371/journal.pntd.0007621
- 554 30. Liu D, Tong M-L, Luo X, Liu L-L, Lin L-R, Zhang H-L, et al. Profile of the *tprK* gene  
555 in primary syphilis patients based on next-generation sequencing. *PLOS Neglected*  
556 *Tropical Diseases.* 2019;13: e0006855. doi:10.1371/journal.pntd.0006855
- 557 31. Dixon P. VEGAN, a package of R functions for community ecology. *Journal of*  
558 *Vegetation Science.* 2003;14: 927–930. doi:10.1111/j.1654-1103.2003.tb02228.x
- 559 32. Chambers VS, Marsico G, Boutell JM, Di Antonio M, Smith GP, Balasubramanian  
560 S. High-throughput sequencing of DNA G-quadruplex structures in the human  
561 genome. *Nat Biotechnol.* 2015;33: 877–881. doi:10.1038/nbt.3295
- 562 33. Reid TB, Molini BJ, Fernandez MC, Lukehart SA. Antigenic variation of TprK  
563 facilitates development of secondary syphilis. *Infect Immun.* 2014;82: 4959–4967.  
564 doi:10.1128/IAI.02236-14



- 565 34. Charles A Janeway J, Travers P, Walport M, Shlomchik MJ. The generation of  
566 diversity in immunoglobulins. *Immunobiology: The Immune System in Health and*  
567 *Disease* 5th edition. 2001 [cited 2 Jan 2020]. Available:  
568 <https://www.ncbi.nlm.nih.gov/books/NBK27140/>
- 569 35. Alberts B, Johnson A, Lewis J, Raff M, Roberts K, Walter P. *The Generation of*  
570 *Antibody Diversity*. *Molecular Biology of the Cell* 4th edition. 2002 [cited 2 Jan  
571 2020]. Available: <https://www.ncbi.nlm.nih.gov/books/NBK26860/>
- 572 36. Mora T, Walczak AM. Quantifying lymphocyte receptor diversity. *bioRxiv*. 2016;  
573 046870. doi:10.1101/046870
- 574 37. LaFond RE, Molini BJ, Van Voorhis WC, Lukehart SA. Antigenic variation of TprK V  
575 regions abrogates specific antibody binding in syphilis. *Infect Immun*. 2006;74:  
576 6244–51. doi:10.1128/IAI.00827-06
- 577
- 578

579 **Tables**

580 Table 1. Summary statistics of patient metadata for strains sequenced in this study

| Location                        |                         | % (n=13)   |
|---------------------------------|-------------------------|------------|
|                                 | Milan                   | 30.77      |
|                                 | Turin                   | 69.23      |
| Stage                           |                         |            |
|                                 | Primary                 | 53.85      |
|                                 | Secondary               | 46.15      |
| Type                            |                         |            |
|                                 | 14d/g                   | 61.54      |
|                                 | 13d/g                   | 23.08      |
|                                 | 13d/d                   | 7.69       |
|                                 | 6d/f                    | 7.69       |
| Gender                          |                         |            |
|                                 | Male                    | 100        |
| Sexual Orientation              |                         |            |
|                                 | MSM                     | 100        |
| Age                             |                         |            |
|                                 | Median [Min-Max]        | 39 [20-57] |
| HIV Status                      |                         |            |
|                                 | Positive                | 61.54      |
|                                 | Negative                | 38.46      |
| Lesion Location                 |                         |            |
|                                 | Genital                 | 53.85      |
|                                 | Anal                    | 46.15      |
| Genotypic Antibiotic Resistance |                         |            |
|                                 | Tetracycline Resistance | 0          |
|                                 | Macrolide Resistance    | 100        |
| Infection Status                |                         |            |
|                                 | First Time Infected     | 69.23      |
|                                 | Previous Infection      | 30.77      |

581

582

583

584

585

Table 2. Comparison of the total number of variable region sequences and total Shannon diversity scores across the 7 variable regions of TprK in the context of clinical characteristics and passage history.

586

|                        | Strain<br>s<br>n       | Total no. of variable region<br>sequences |                 | Total Diversity    |              |
|------------------------|------------------------|-------------------------------------------|-----------------|--------------------|--------------|
|                        |                        | Median (Range)                            | p-value         | Median (Range)     | p-value      |
| Stage                  |                        |                                           |                 |                    | 587          |
|                        | Primary                | 7                                         | 58 (37-65)      | 2.70 (1.49-4.75)   | 588          |
|                        | Secondary              | 6                                         | 100 (65-162)    | 7.69 (4.20-9.39)   | 0.002<br>589 |
| HIV Status             |                        |                                           |                 |                    | 590          |
|                        | Positive               | 8                                         | 93.5 (37-162)   | 4.74 (2.64-9.39)   | 0.171        |
|                        | Negative               | 5                                         | 60 (55-65)      | 2.70 (1.49-7.06)   | 591          |
| Lesion Location        |                        |                                           |                 |                    | 592          |
|                        | Genital                | 7                                         | 60 (54-96)      | 7.69 (3.27-9.39)   | 0.035        |
|                        | Anal                   | 6                                         | 84.5 (37-162)   | 2.70 (1.49-5.28)   | 592          |
| Infection Status       |                        |                                           |                 |                    | 593          |
|                        | First Time<br>Infected | 9                                         | 61 (37-128)     | 4.20 (1.40-9.24)   | 0.711        |
|                        | Previous<br>Infection  | 4                                         | 80.5 (54-162)   | 4.69 (2.64-9.39)   | 594          |
| Passaged in<br>Rabbits |                        |                                           |                 |                    | 595          |
|                        | Yes                    | 2*                                        | 177.5 (136-219) | 12.12 (8.70-15.53) | 0.075        |
|                        | No                     | 13                                        | 67 (37-162)     | 4.20 (1.49-9.39)   | 596          |

597

598 \*Isolates were previously profiled by Addetia, et. al. [24]

599 **Figure Legends**

600 **Figure 1 – Full-length TprK phylogeny of all protein sequences present at greater**  
601 **than 0.2% within each individual from 13 patients from Italy.** Only intact full-length  
602 TprK sequences derived from PacBio sequencing were used to generate the  
603 phylogenetic tree. Each individual is labeled by a different color and the proportion of  
604 sequences is shown by node size. Only three total sequences were shared among the  
605 634 TprK sequences present in the 13 *T. pallidum* specimens sequenced in this study.

606

607 **Figure 2 – TprK variable region sequence heatmap.** Heatmap display of all deep  
608 sequenced *tprK* from clinical specimens to date, comprising 13 individuals from Italy  
609 sequenced here and 28 Chinese individuals from prior work. For print display, only  
610 those variable region sequences present at  $\geq 20\%$  frequency within a sample are  
611 depicted. Any variable frequencies less than 2% in other samples are not shown. The  
612 proportion of sequences is illustrated by color for each heatmap for V1 (A), V2 (B), V3  
613 (C), V4 (D), V5 (E), V6 (F), and V7 (F). A heatmap filtered at a frequency of 1% is  
614 provided as an interactive html as Supplemental File 1.

615

616 **Figure 3 – Map of *tprK* donor sites flanking the *tprD* locus.** Variable region  
617 sequences were blastn aligned against a 17.2kb locus that contained putative *tprK*  
618 donor sites based on manual review. A) The usage of all 55 donor sites across the *tprD*  
619 locus by variable region is depicted based on the sum of within-sample percentages  
620 across all 41 samples. The entire 17.2kb locus is depicted due to recovery of a V4  
621 donor site within the *phnU* gene at 16.9kb. Nucleotide numbering is shown based on

622 the strain UW-148B2 (CP045004.1). B) Zoomed in depiction of the locus immediately  
623 downstream of *tprD* containing *tprK* donor sites. Donor sites are in the same orientation  
624 as the *tprD* locus. The light brown sites include 45 of the 47 donor sites reported  
625 previously by Centurion et al. [25]. The bottom donor sites include 51 of the 55 donor  
626 sites found in this study and are colored based on their associated variable region.

627

628 **Figure 4 – Donor site segments and position by V region.** A) The number of donor  
629 site contribution segments in each high-confidence variable region sequence was  
630 determined in blastn output across the 41 samples. Usage was determined by the sum  
631 percentage of variable region sequences by segment. For instance, V1 has the most  
632 number of variable region sequences where only one donor site segment is used in a  
633 given V region sequence, consistent with its overall lack of diversity. B) The position of  
634 donor site contributions within a variable region sequence was also determined for each  
635 donor site (i.e. “First” means the donor site was found as the first alignment within a  
636 variable region sequence, “Second” as the second portion of the variable region  
637 sequence alignment, and “Third” as the third). Within-sample percentages were  
638 summed for each variable region in order to adjust for differences in read coverage at  
639 each locus between samples. These summed percentages were then adjusted by the  
640 total summed percentage to add up to 100% for each variable region.

641

642

## 643 **Supplemental Figure Legends**

644 **Supplemental Figure 1** – Measurements of diversity are consistent in technical  
645 replicates and not significantly affected by template DNA > 1,000 treponemal copies.

646 For strains AS10 (A), AS11 (B), AS12 (C), and AS18 (D) we compared using the  
647 maximal template amount allowed by our PCR reaction versus 1,000 treponemal  
648 copies. Matched variable regions between the high and normal (1,000 copies) samples  
649 are connected by a line and share the same color.

650

651 **Supplemental Figure 2** – Illumina versus PacBio variable sequence allele frequencies  
652 scatterplot for each sample. Each data point is a specific variable region sequence and  
653 different regions are labeled by color.

654

655 **Supplemental Figure 3** – Blast sequence length alignment versus variable region  
656 sequence length plots before and after variable region sequence filtering. A) Scatterplot  
657 of total sequence length alignment versus variable region sequence length after filtering  
658 of V2, V3, and V5 variable region sequences of likely conserved region sequences. B)  
659 Corresponding histogram of differences in total sequence length and alignment length  
660 after filtering. C) Scatterplot of total sequence length alignment versus variable region  
661 sequence length based on prior definitions of variable region sequences. D)  
662 Corresponding histogram of differences in total sequence and alignment length without  
663 filtering. Counts are absolute sequencing read counts across all 41 samples.

664

665 **Supplemental File 1** – Interactive HTML heatmap of TprK V region frequencies across  
666 13 Italian individuals and 28 Chinese individuals. The file contains any variable region  
667 sequence present in at least one strain at a frequency greater than 1%.

668

669 **Supplemental File 2** – CSV file containing TprK V region sequences extracted from 13  
670 Italian individuals and 28 Chinese individuals previously deep sequenced in *tprK*. Only  
671 variable regions present in at least one sample with a minimum of 1% frequency are  
672 displayed, as in Supplemental File 1.

673

674 **Supplemental File 3** – GFF file of *tprD* locus used in this study with previous donor  
675 sites and newly annotated donor sites.

0.01

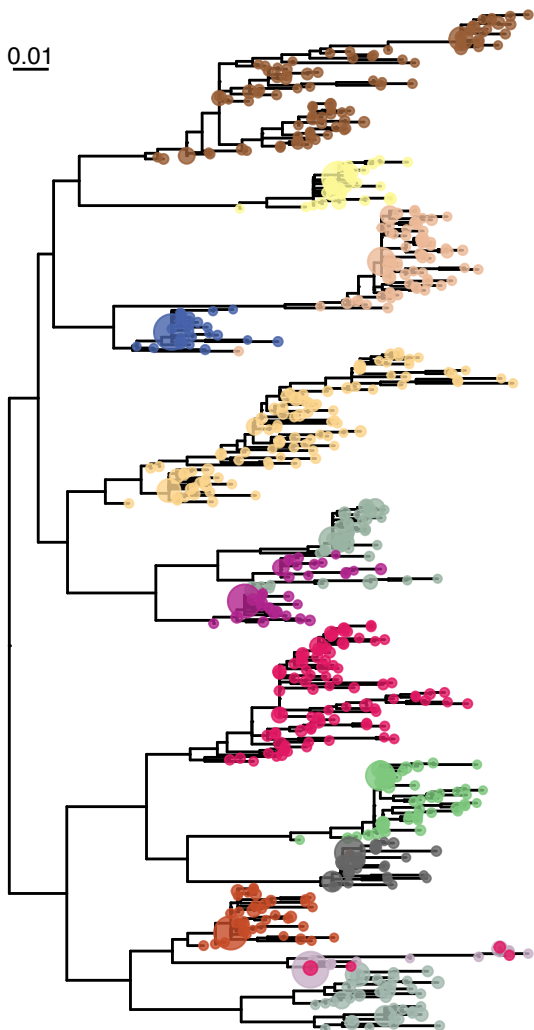

Frequency

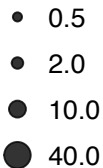

Sample

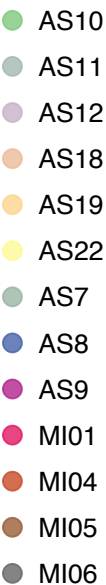



### V1

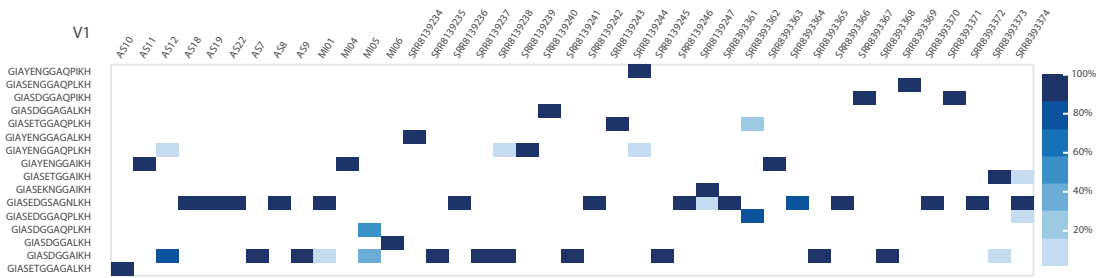

### V2

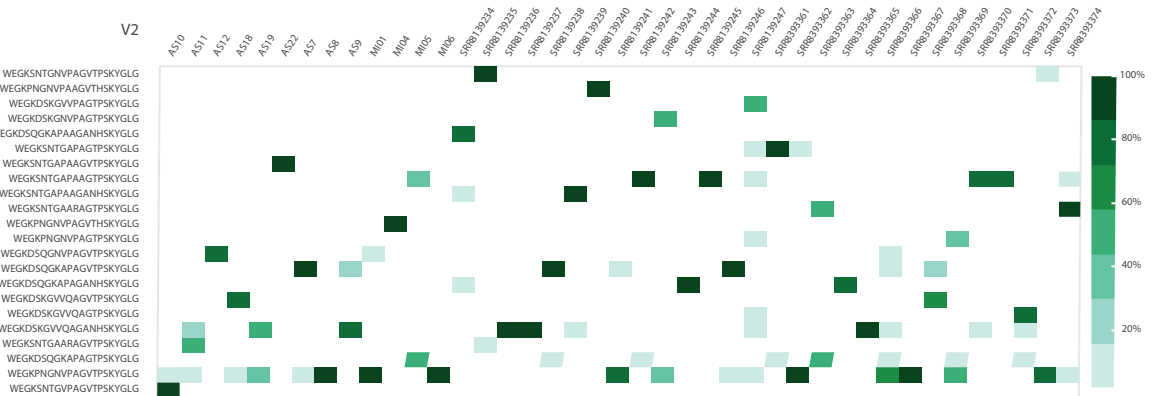

### V3

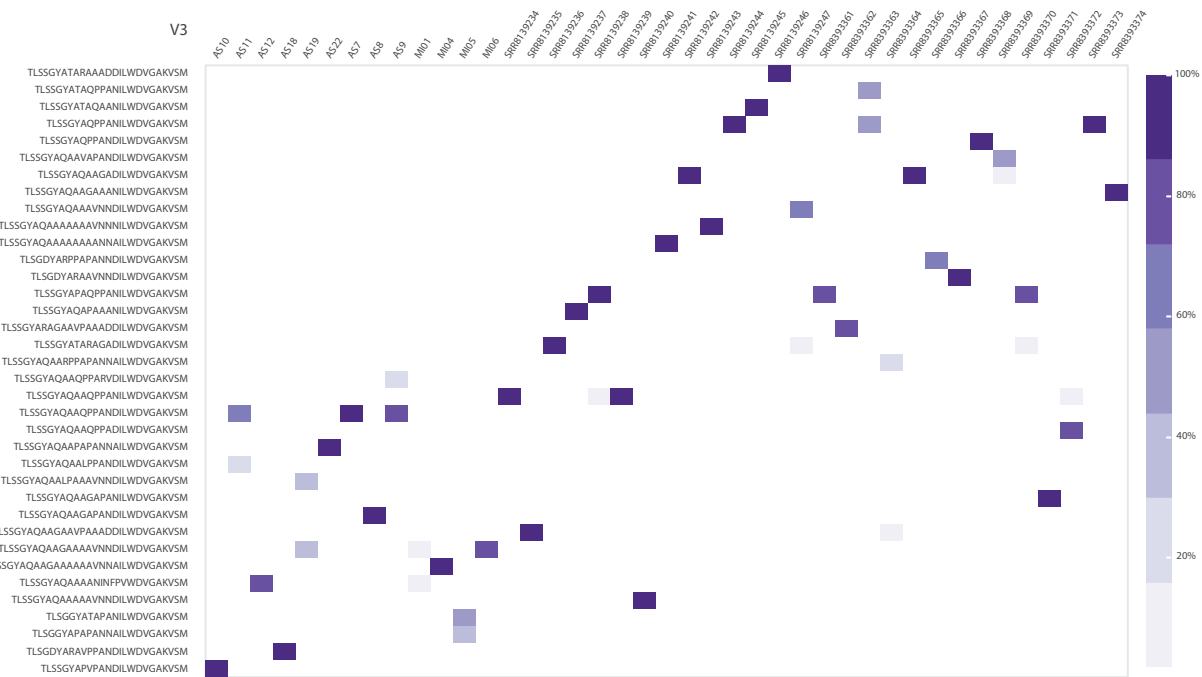

### V4

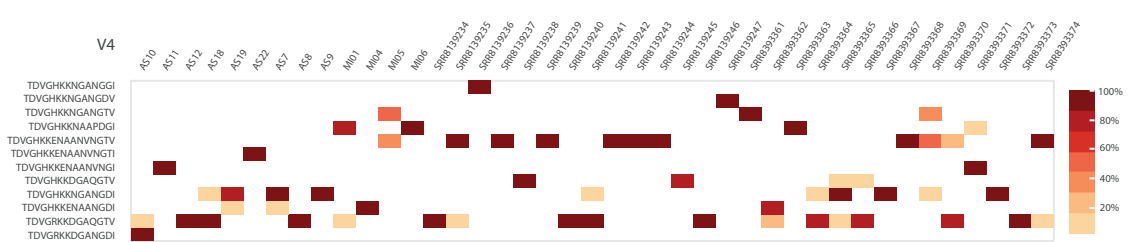



V7

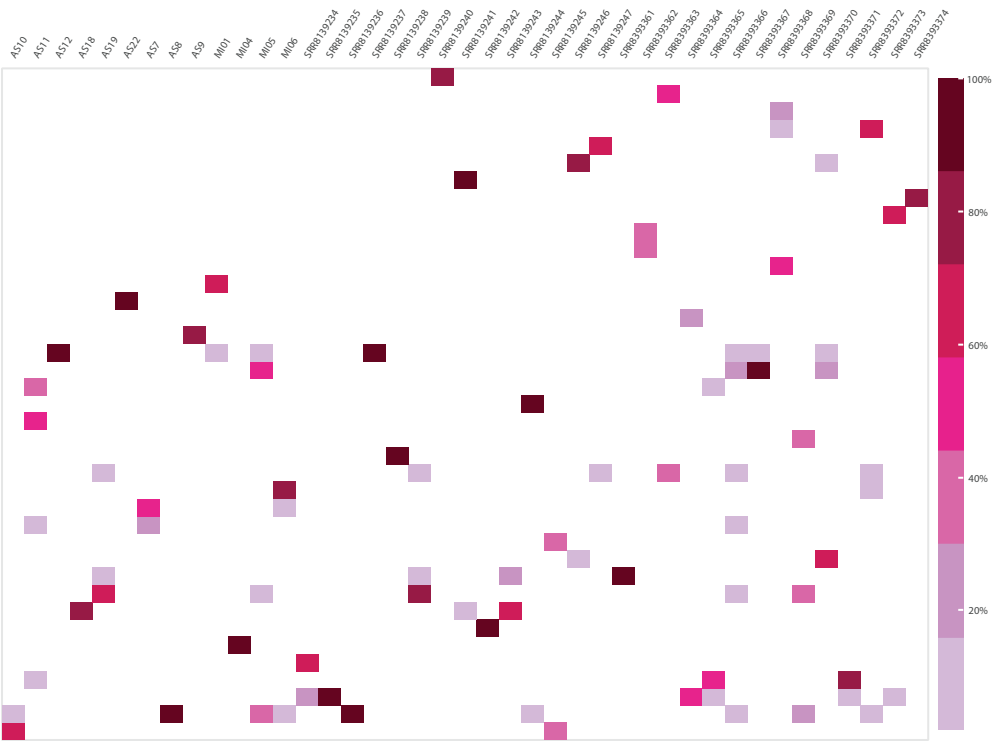

A

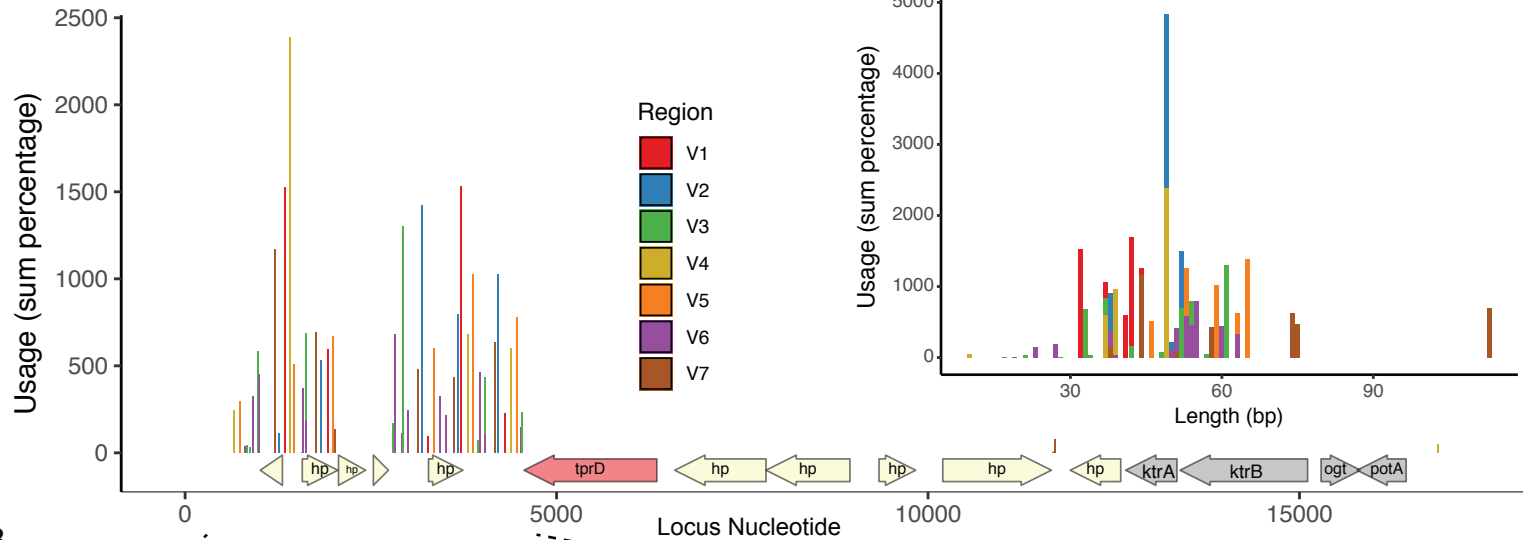

C

B

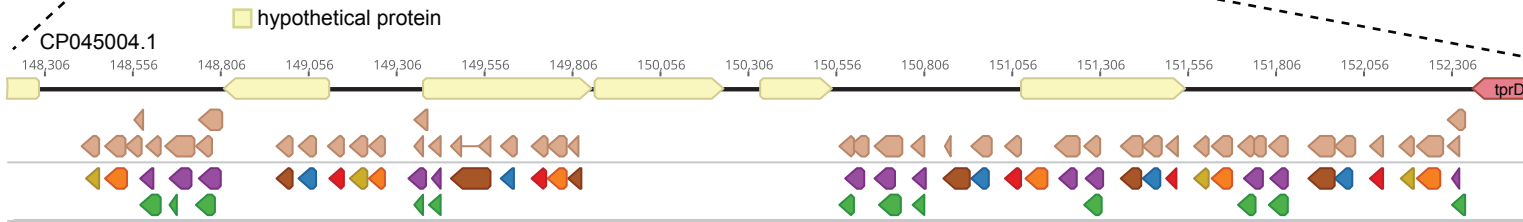

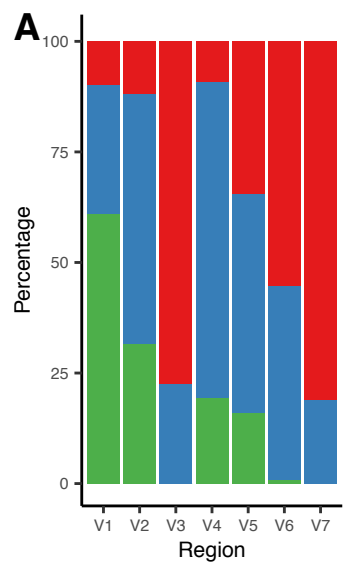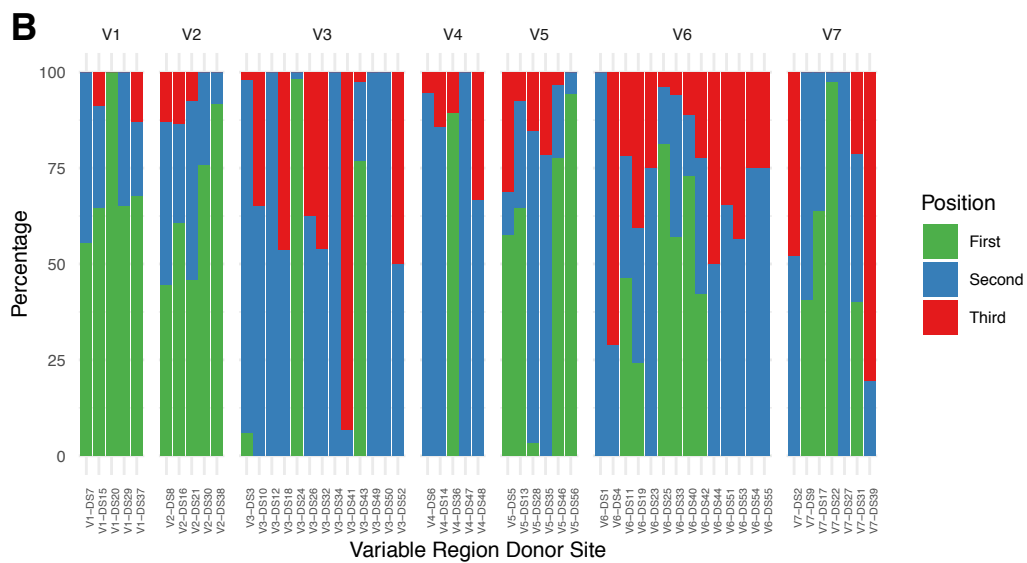

**A**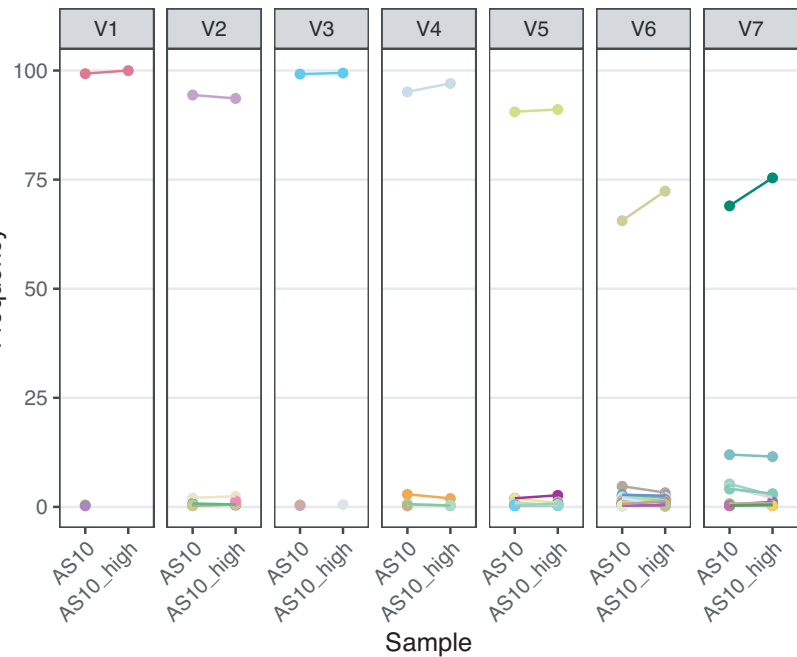**B**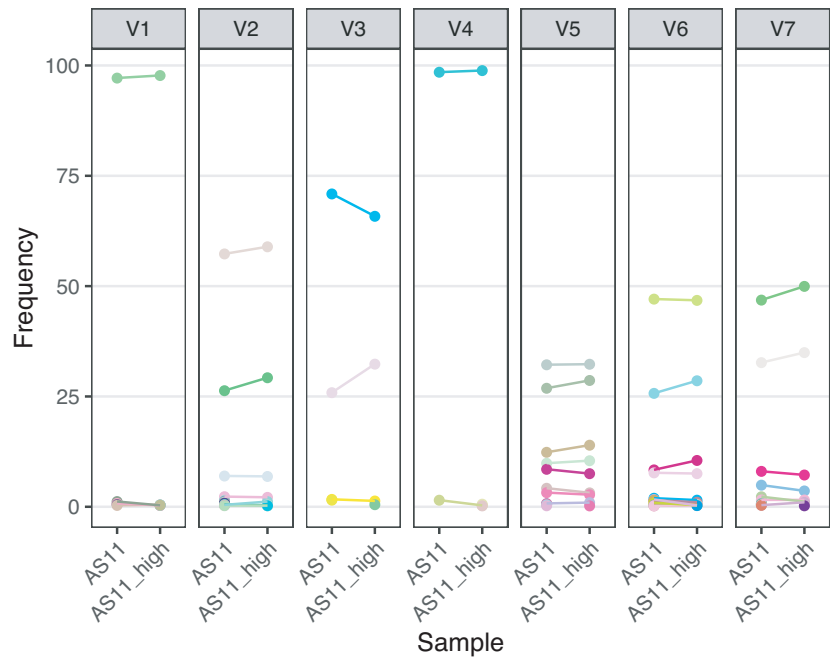**C**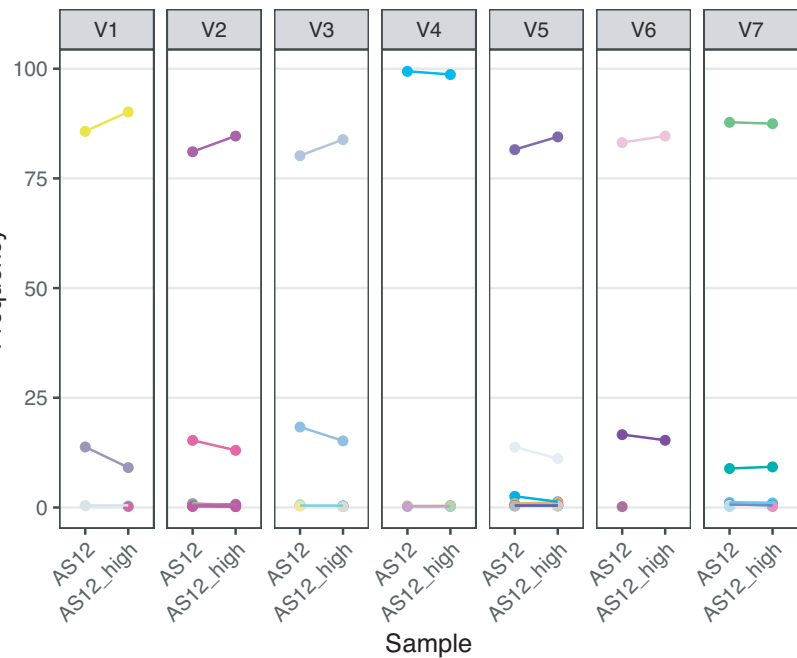**D**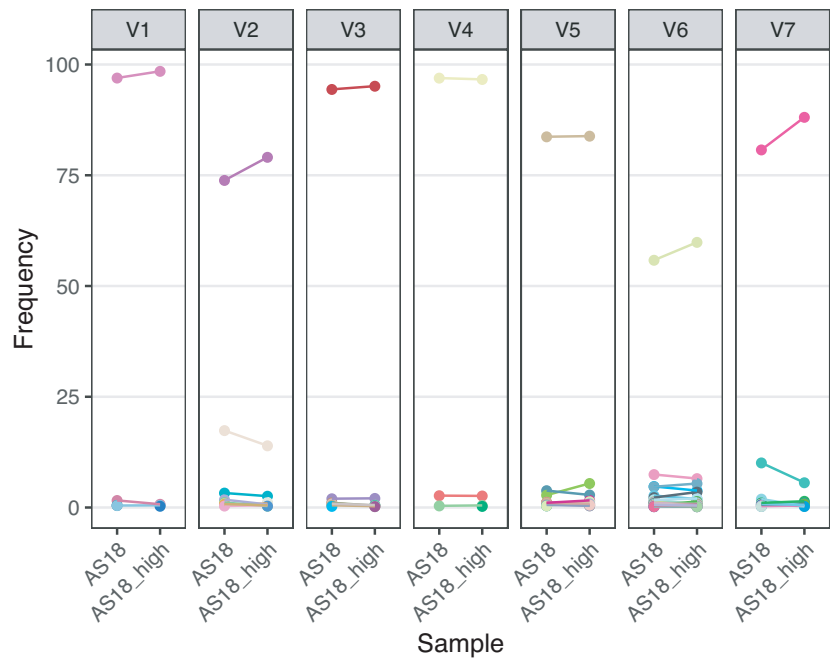

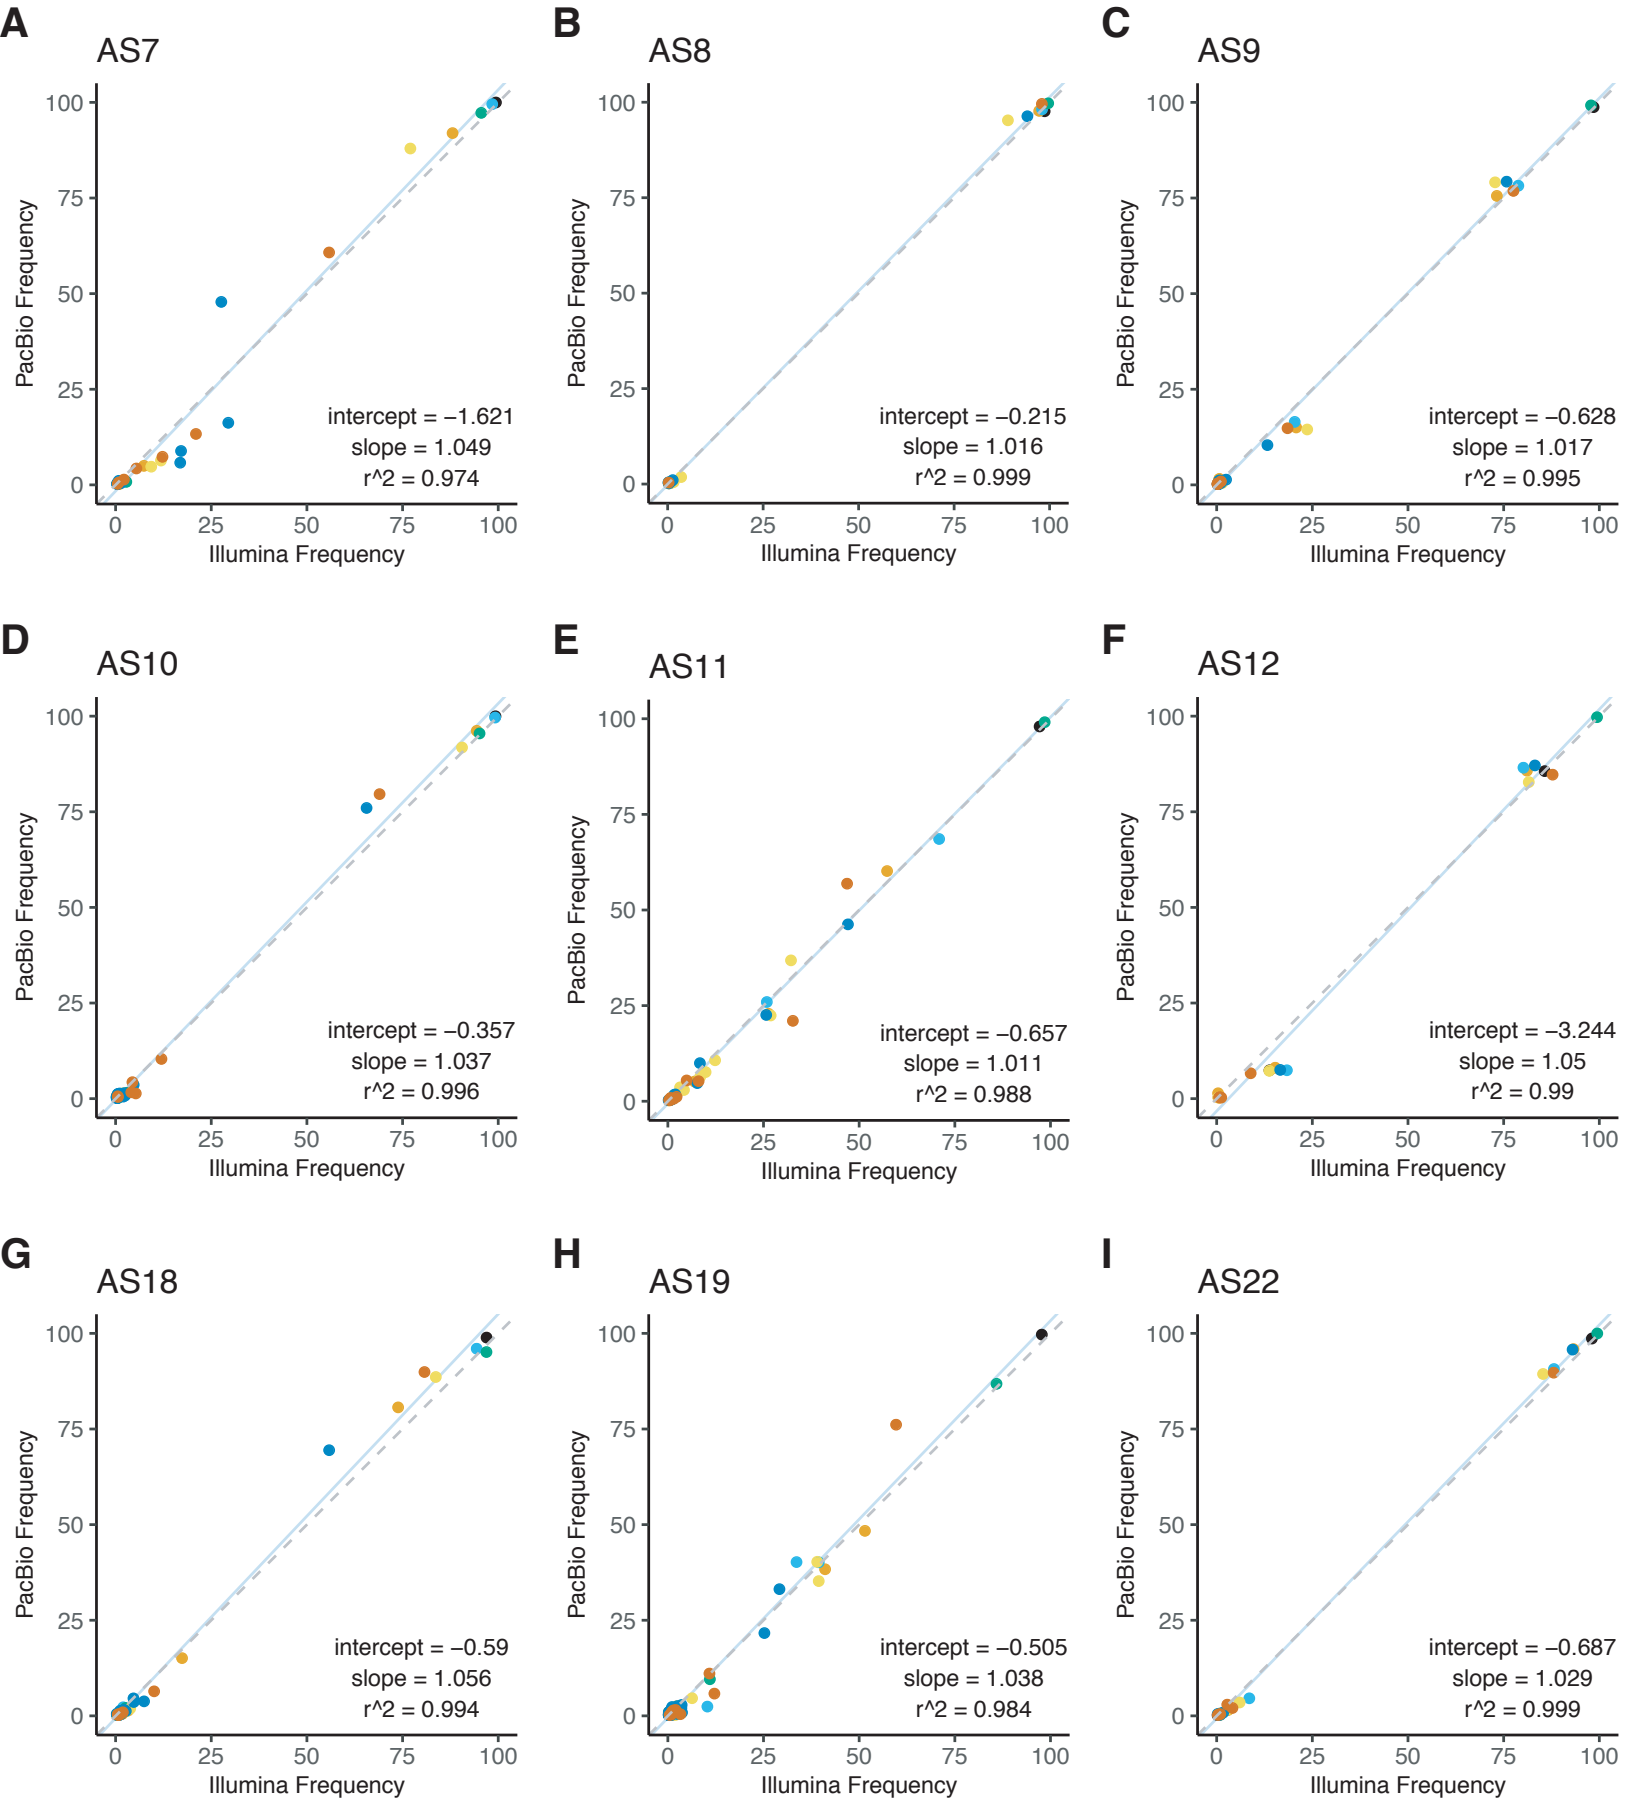

**J**

MI01

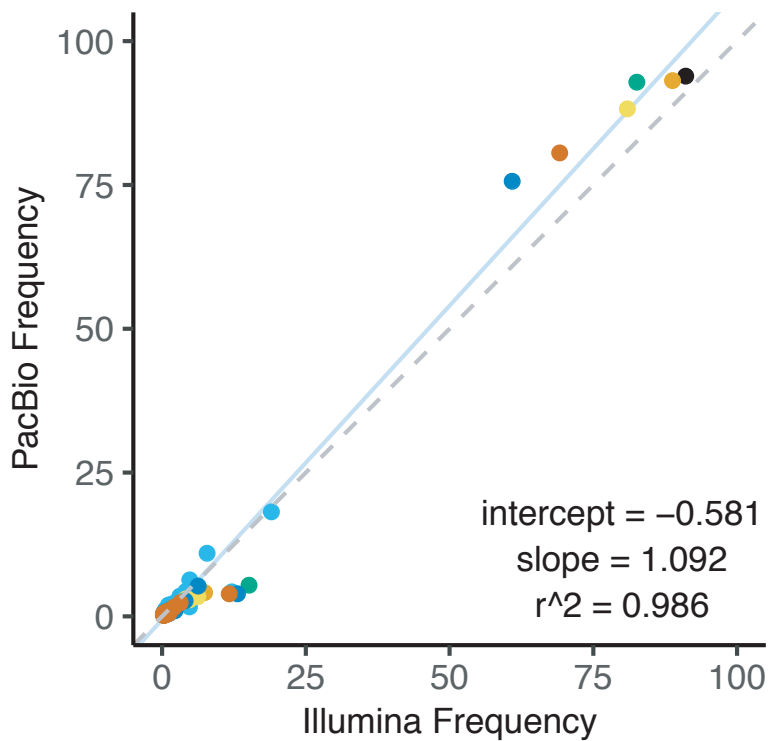**K**

MI04

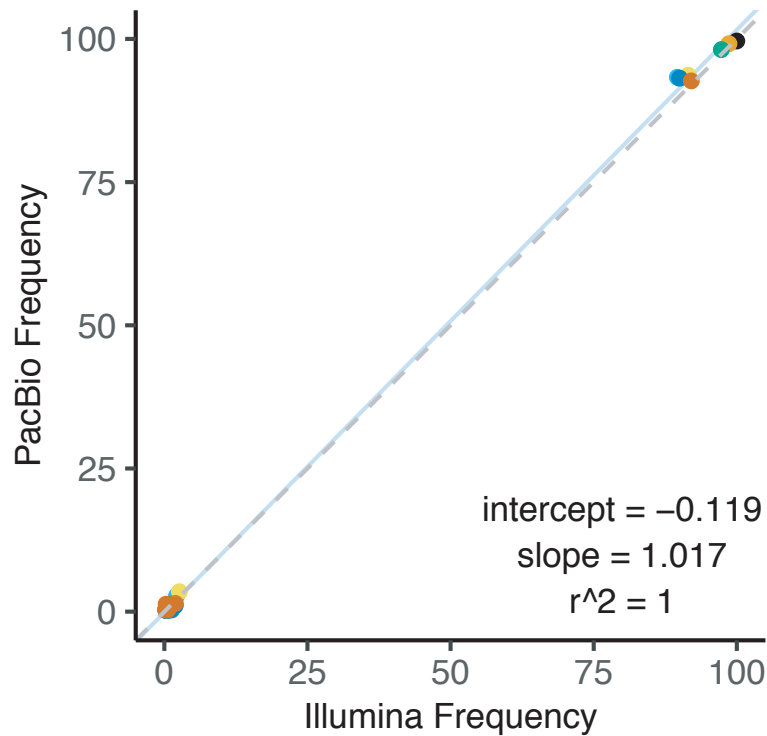**L**

MI05

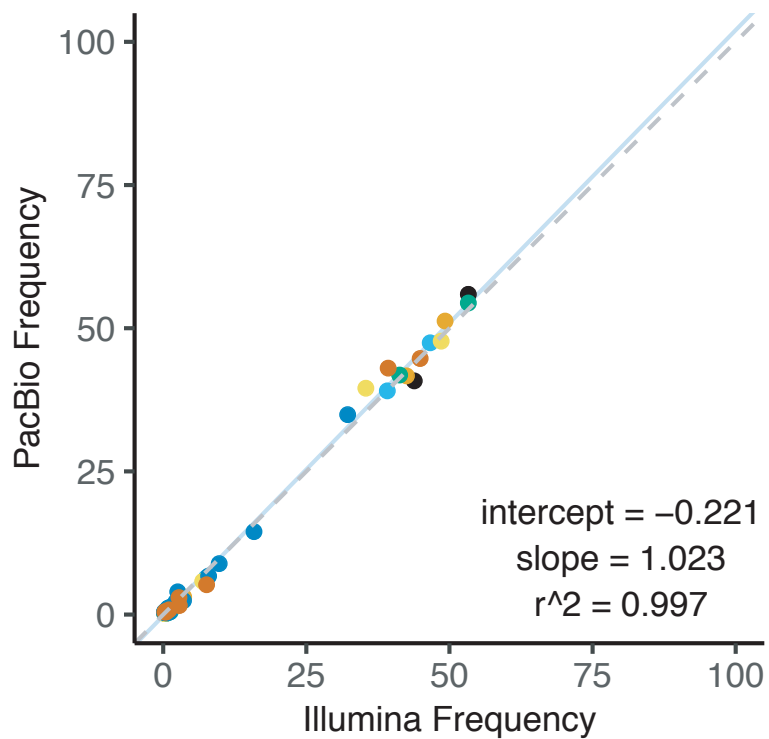**M**

MI06

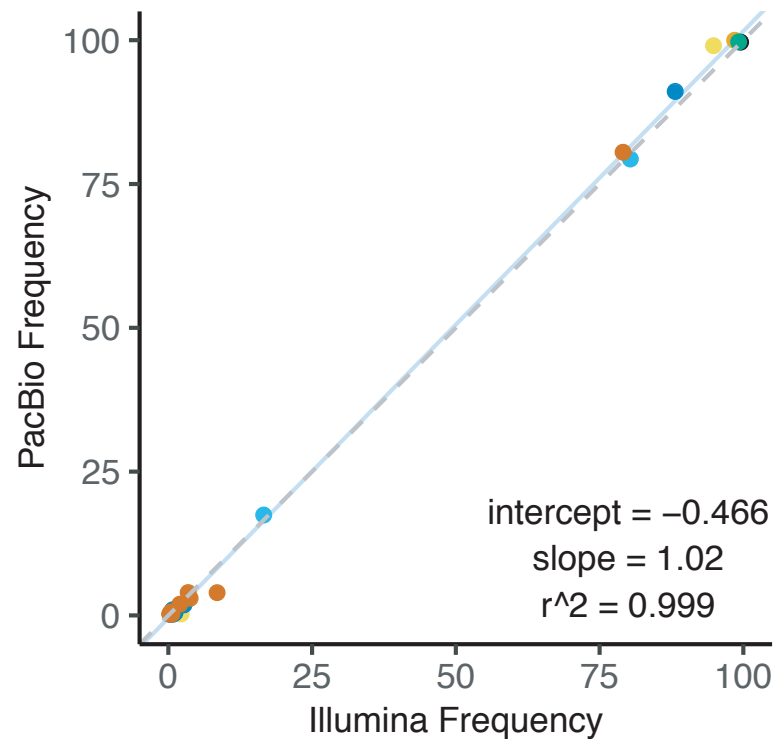



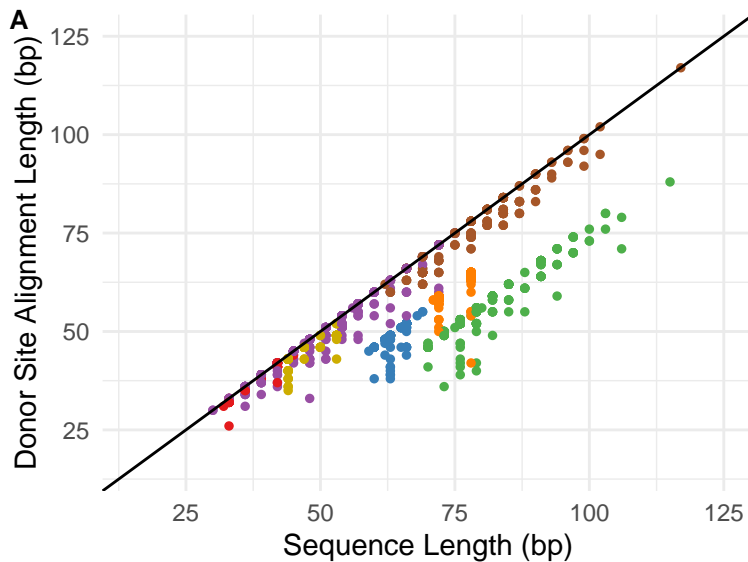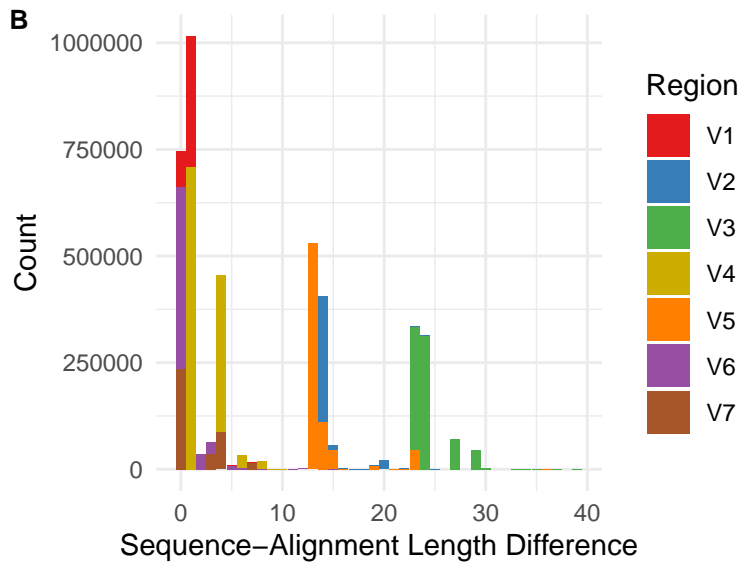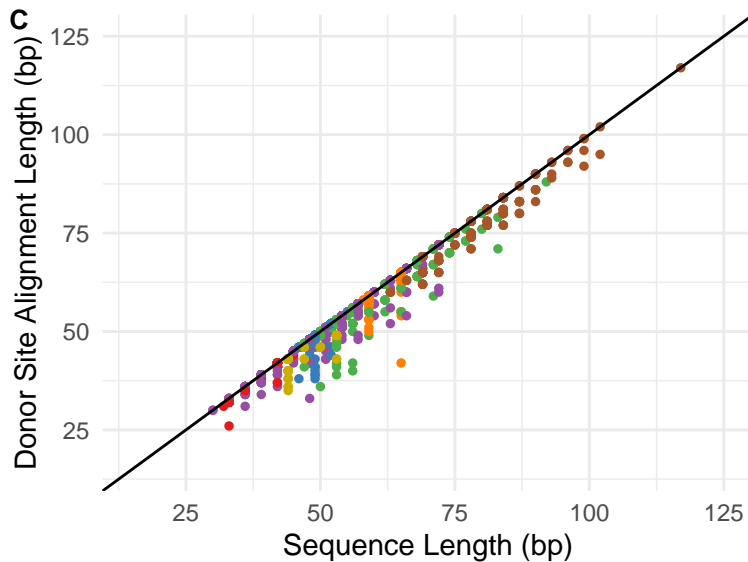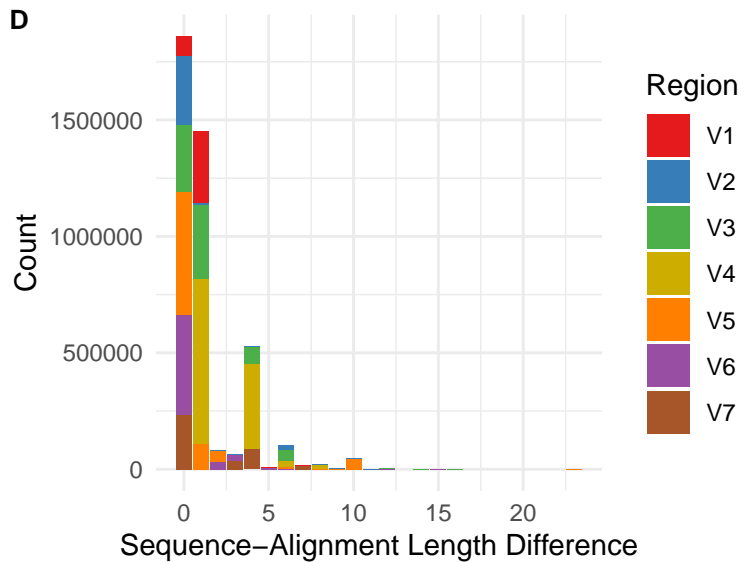

Table S1. PacBio barcoded *tprK* primers used in this study.

| Primer Name   | Sequence (5' -> 3')                      |
|---------------|------------------------------------------|
| tprK-F_bc1001 | CACATATCAGAGTGC GGGAAAGAAAAGAACCATACATCC |
| tprK-F_bc1002 | ACACACAGACTGTGAGGGAAAGAAAAGAACCATACATCC  |
| tprK-F_bc1003 | ACACATCTCGTGAGAGGGAAAGAAAAGAACCATACATCC  |
| tprK-F_bc1004 | CACGCACACACGCGCGGGAAAGAAAAGAACCATACATCC  |
| tprK-F_bc1005 | CACTCGACTCTCGCGTGGAAGAAAAGAACCATACATCC   |
| tprK-F_bc1006 | CATATATATCAGCTGTGGAAGAAAAGAACCATACATCC   |
| tprK-F_bc1007 | TCTGTATCTCTATGTGGAAAGAAAAGAACCATACATCC   |
| tprK-F_bc1008 | ACAGTCGAGCGCTGCGGGAAAGAAAAGAACCATACATCC  |
| tprK-R_bc1009 | ACACACGCGAGACAGACGCAGTTCCGGATTCTG        |
| tprK-R_bc1010 | ACGCGCTATCTCAGAGCGCAGTTCCGGATTCTG        |
| tprK-R_bc1011 | CTATACGTATATCTATCGCAGTTCCGGATTCTG        |
| tprK-R_bc1012 | ACACTAGATCGCGTGTCGCAGTTCCGGATTCTG        |
| tprK-R_bc1013 | CTCTCGCATACGCGAGCGCAGTTCCGGATTCTG        |
| tprK-R_bc1014 | CTCACTACGCGCGGTCGCAGTTCCGGATTCTG         |
| tprK-R_bc1015 | CGCATGACACGTGTGTCGCAGTTCCGGATTCTG        |
| tprK-R_bc1016 | CATAGAGAGATAGTATCGCAGTTCCGGATTCTG        |

Table S2. SRA Accessions for Sequencing Libraries

| SRA Accession | Library                    |
|---------------|----------------------------|
| SRR10953926   | AS7_tprk_nextera           |
| SRR10953925   | AS7_tprk_pacbio            |
| SRR10953914   | AS8_tprk_nextera           |
| SRR10953903   | AS8_tprk_pacbio            |
| SRR10953902   | AS9_tprk_nextera           |
| SRR10953901   | AS9_tprk_pacbio            |
| SRR10953900   | AS10_tprk_nextera          |
| SRR10953899   | AS10_tprk_nextera_highcopy |
| SRR10953898   | AS10_tprk_pacbio           |
| SRR10953897   | AS11_tprk_nextera          |
| SRR10953924   | AS11_tprk_nextera_highcopy |
| SRR10953923   | AS11_tprk_pacbio           |
| SRR10953921   | AS12_tprk_nextera_highcopy |
| SRR10953922   | AS12_tprk_nextera          |
| SRR10953920   | AS12_tprk_pacbio           |
| SRR10953919   | AS18_tprk_nextera          |
| SRR10953918   | AS18_tprk_nextera_highcopy |
| SRR10953917   | AS18_tprk_pacbio           |
| SRR10953916   | AS19_tprk_nextera          |
| SRR10953915   | AS19_tprk_pacbio           |
| SRR10953913   | AS22_tprk_nextera          |
| SRR10953912   | AS22_tprk_pacbio           |
| SRR10953911   | MI01_tprk_nextera          |
| SRR10953910   | MI01_tprk_pacbio           |
| SRR10953909   | MI04_tprk_nextera          |
| SRR10953908   | MI04_tprk_pacbio           |
| SRR10953907   | MI05_tprk_nextera          |
| SRR10953906   | MI05_tprk_pacbio           |
| SRR10953905   | MI06_tprk_nextera          |
| SRR10953904   | MI06_tprk_pacbio           |

Table S3. Individual metadata for strains sequenced in this study

| Sample ID | Tp0548 sequ | TpREG type | Age | 23S rRNA PC1 | 23S A2058G | 23S A2059G | Strain Type | (Macrolide re 16S Tetracycl) | Gender   | Age | MSM | HIV status | Syphilis Stage | Lesion Local | Non-treponemal test performed at sample collection | Sexual networking/travel history data? | First syphilis diagnosis of previously diagnosed? |                                                                   |                                                       |
|-----------|-------------|------------|-----|--------------|------------|------------|-------------|------------------------------|----------|-----|-----|------------|----------------|--------------|----------------------------------------------------|----------------------------------------|---------------------------------------------------|-------------------------------------------------------------------|-------------------------------------------------------|
| A57       | G           | D          | 14  | POSITIVE     | PRESENT    | ABSENT     | 14D/G       | YES                          | Negative | M   | 26  | yes        | neg            | primary      | genital                                            | RPR neg                                | TPPA 1:80                                         | new sex partner with suspected syphilis-4 ptrs last 6 mo          | first time diagnosed -                                |
| A58       | G           | D          | 14  | POSITIVE     | PRESENT    | ABSENT     | 14D/G       | YES                          | Negative | M   | 22  | yes        | neg            | primary      | genital                                            | RPR neg                                | TPPA 1:540                                        | 4 ptrs last 6 mo                                                  | first time diagnosed -                                |
| A59       | G           | D          | 14  | POSITIVE     | PRESENT    | ABSENT     | 14D/G       | YES                          | Negative | M   | 51  | yes        | pos            | primary      | anal                                               | RPR 1:8                                | TPPA not done                                     | HIV positive partner plus 8 ptrs last six mo.                     | syphilis in 2009 -no others episodes till now         |
| A510      | G           | D          | 14  | POSITIVE     | PRESENT    | ABSENT     | 14D/G       | YES                          | Negative | M   | 41  | yes        | pos            | secondary    | genital                                            | RPR 1:16                               | TPPA 1:20480                                      | 8 ptrs last six mo.                                               | first time diagnosed -                                |
| A511      | G           | D          | 14  | POSITIVE     | PRESENT    | ABSENT     | 14D/G       | YES                          | Negative | M   | 32  | yes        | neg            | secondary    | anal                                               | RPR 1:16                               | TPPA 1:20480                                      | Six contacts in north-east Italy; 13 ptrs last six mo.            | first time diagnosed -                                |
| A512      | G           | D          | 14  | POSITIVE     | PRESENT    | ABSENT     | 14D/G       | YES                          | Negative | M   | 54  | yes        | pos            | primary      | anal                                               | RPR neg                                | TPPA not done                                     | frequent sex contacts in Milan in saunas; 60 ptrs last six mo.    | first time diagnosed -                                |
| A518      | G           | D          | 14  | POSITIVE     | PRESENT    | ABSENT     | 14D/G       | YES                          | Negative | M   | 33  | yes        | pos            | secondary    | genital                                            | RPR 1:32                               | TPPA not done                                     | habitual cruising ;saunas; regular gay chat; 20 ptrs last six mo. | secondary syphilis in 2014 no other episodes till now |
| A519      | G           | D          | 14  | POSITIVE     | PRESENT    | ABSENT     | 14D/G       | YES                          | Negative | M   | 42  | yes        | pos            | secondary    | anal                                               | RPR 1:16                               | TPPA not done                                     | habitual cruising ;saunas; regular gay chat; 35 ptrs last six mo. | syphilis in 1996 no others episodes till now          |
| A522      | G           | D          | 13  | POSITIVE     | PRESENT    | ABSENT     | 13D/G       | YES                          | Negative | M   | 35  | yes        | neg            | primary      | genital                                            | RPR neg                                | TPPA 1:20480                                      | only one regular partner last 6 mo.                               | first time diagnosed                                  |
| M01       | F           | D          | 6   | POSITIVE     | PRESENT    | ABSENT     | 6D/F        | YES                          | Negative | M   | 39  | yes        | pos            | secondary    | anal                                               | VDRL 1:32                              | TPHA 1:80                                         | milano                                                            | no                                                    |
| M04       | G           | D          | 13  | POSITIVE     | PRESENT    | ABSENT     | 13D/G       | YES                          | Negative | M   | 20  | yes        | neg            | primary      | genital                                            | VDRL 1:4                               | TPHA 1:80                                         | milano                                                            | no                                                    |
| M05       | D           | D          | 13  | POSITIVE     | PRESENT    | ABSENT     | 13D/D       | YES                          | Negative | M   | 54  | yes        | pos            | secondary    | anal                                               | VDRL 1:32                              | TPHA 1:80                                         | canarie                                                           | no                                                    |
| M06       | G           | D          | 13  | POSITIVE     | PRESENT    | ABSENT     | 13D/G       | YES                          | Negative | M   | 57  | yes        | pos            | primary      | genital                                            | VDRL 1:16                              | TPHA 1:80                                         | milano                                                            | si                                                    |

**Table S4.** Comparison of the number of variable region sequences and diversity measures identified the 7 variable regions based on t

|                  |                                                                 |                                           | V1                                        |         | V2                                        |         | V3                                        |         | V4                                        |         | V5                                        |         | V6                                        |         | V7                                        |         | Total                                     |         |       |    |       |       |    |       |       |
|------------------|-----------------------------------------------------------------|-------------------------------------------|-------------------------------------------|---------|-------------------------------------------|---------|-------------------------------------------|---------|-------------------------------------------|---------|-------------------------------------------|---------|-------------------------------------------|---------|-------------------------------------------|---------|-------------------------------------------|---------|-------|----|-------|-------|----|-------|-------|
|                  | Copies of<br>treponemal<br>DNA input<br>into <i>tpoK</i><br>PCR | No. of<br>variable<br>region<br>sequences | No. of<br>variable<br>region<br>sequences |         | No. of<br>variable<br>region<br>sequences |         | No. of<br>variable<br>region<br>sequences |         | No. of<br>variable<br>region<br>sequences |         | No. of<br>variable<br>region<br>sequences |         | No. of<br>variable<br>region<br>sequences |         | No. of<br>variable<br>region<br>sequences |         | No. of<br>variable<br>region<br>sequences |         |       |    |       |       |    |       |       |
|                  |                                                                 |                                           | Evenness                                  | Shannon | Evenness                                  | Shannon | Evenness                                  | Shannon | Evenness                                  | Shannon | Evenness                                  | Shannon | Evenness                                  | Shannon | Evenness                                  | Shannon | Evenness                                  | Shannon |       |    |       |       |    |       |       |
| <b>AS10</b>      | 1000                                                            | 3                                         | 0.042                                     | 0.047   | 10                                        | 0.141   | 0.324                                     | 3       | 0.047                                     | 0.052   | 6                                         | 0.142   | 0.254                                     | 14      | 0.202                                     | 0.532   | 39                                        | 0.485   | 1.776 | 16 | 0.437 | 1.210 | 91 | 1.495 | 4.196 |
| <b>AS10_high</b> | 5362                                                            | 1                                         | 0                                         | 0       | 8                                         | 0.167   | 0.347                                     | 2       | 0.050                                     | 0.035   | 5                                         | 0.101   | 0.163                                     | 12      | 0.198                                     | 0.492   | 33                                        | 0.415   | 1.453 | 15 | 0.375 | 1.016 | 76 | 1.306 | 3.504 |
| <b>AS11</b>      | 1000                                                            | 5                                         | 0.103                                     | 0.165   | 13                                        | 0.498   | 1.276                                     | 4       | 0.524                                     | 0.726   | 2                                         | 0.113   | 0.078                                     | 12      | 0.725                                     | 1.801   | 16                                        | 0.578   | 1.603 | 13 | 0.551 | 1.414 | 65 | 3.091 | 7.064 |
| <b>AS11_high</b> | 2736                                                            | 7                                         | 0.076                                     | 0.148   | 10                                        | 0.470   | 1.082                                     | 4       | 0.522                                     | 0.724   | 4                                         | 0.054   | 0.074                                     | 9       | 0.771                                     | 1.695   | 16                                        | 0.533   | 1.477 | 9  | 0.554 | 1.218 | 59 | 2.980 | 6.417 |
| <b>AS12</b>      | 1000                                                            | 3                                         | 0.391                                     | 0.430   | 9                                         | 0.293   | 0.643                                     | 5       | 0.351                                     | 0.565   | 3                                         | 0.036   | 0.040                                     | 7       | 0.330                                     | 0.642   | 3                                         | 0.422   | 0.464 | 7  | 0.253 | 0.491 | 37 | 2.076 | 3.276 |
| <b>AS12_high</b> | 6663                                                            | 4                                         | 0.254                                     | 0.352   | 7                                         | 0.271   | 0.527                                     | 5       | 0.303                                     | 0.488   | 5                                         | 0.054   | 0.087                                     | 8       | 0.287                                     | 0.596   | 2                                         | 0.618   | 0.428 | 8  | 0.242 | 0.503 | 39 | 2.029 | 2.983 |
| <b>AS18</b>      | 1000                                                            | 5                                         | 0.107                                     | 0.173   | 9                                         | 0.406   | 0.891                                     | 7       | 0.158                                     | 0.308   | 3                                         | 0.135   | 0.148                                     | 16      | 0.303                                     | 0.841   | 40                                        | 0.561   | 2.069 | 16 | 0.307 | 0.850 | 96 | 1.706 | 4.593 |
| <b>AS18_high</b> | 1013                                                            | 4                                         | 0.068                                     | 0.095   | 10                                        | 0.336   | 0.774                                     | 10      | 0.124                                     | 0.285   | 4                                         | 0.122   | 0.169                                     | 13      | 0.304                                     | 0.780   | 40                                        | 0.517   | 1.907 | 12 | 0.234 | 0.582 | 93 | 1.977 | 5.280 |

Table S5. Number of variable region sequences and diversity measures for the 7 variable regions of TprK for the 13 strains profiled in this study.

|      | V1                               |          |                   | V2                               |          |                   | V3                               |          |                   | V4                               |          |                   | V5                               |          |                   | V6                               |          |                   | V7                               |          |                   | Total                            |          |                   |
|------|----------------------------------|----------|-------------------|----------------------------------|----------|-------------------|----------------------------------|----------|-------------------|----------------------------------|----------|-------------------|----------------------------------|----------|-------------------|----------------------------------|----------|-------------------|----------------------------------|----------|-------------------|----------------------------------|----------|-------------------|
|      | No. of variable region sequences | Evenness | Shannon Diversity | No. of variable region sequences | Evenness | Shannon Diversity | No. of variable region sequences | Evenness | Shannon Diversity | No. of variable region sequences | Evenness | Shannon Diversity | No. of variable region sequences | Evenness | Shannon Diversity | No. of variable region sequences | Evenness | Shannon Diversity | No. of variable region sequences | Evenness | Shannon Diversity | No. of variable region sequences | Evenness | Shannon Diversity |
| AS7  | 2                                | 0.052    | 0.036             | 9                                | 0.241    | 0.529             | 4                                | 0.07     | 0.097             | 5                                | 0.141    | 0.226             | 7                                | 0.396    | 0.771             | 20                               | 0.59     | 1.767             | 11                               | 0.55     | 1.319             | 58                               | 2.04     | 4.745             |
| AS8  | 3                                | 0.069    | 0.076             | 7                                | 0.088    | 0.172             | 7                                | 0.067    | 0.111             | 2                                | 0.034    | 0.023             | 15                               | 0.218    | 0.591             | 15                               | 0.134    | 0.363             | 6                                | 0.072    | 0.13              | 55                               | 0.882    | 1.486             |
| AS9  | 4                                | 0.068    | 0.094             | 11                               | 0.356    | 0.853             | 3                                | 0.499    | 0.548             | 5                                | 0.082    | 0.131             | 8                                | 0.359    | 0.746             | 23                               | 0.325    | 1.019             | 11                               | 0.298    | 0.714             | 65                               | 1.987    | 4.105             |
| AS10 | 3                                | 0.042    | 0.047             | 10                               | 0.141    | 0.324             | 3                                | 0.047    | 0.052             | 6                                | 0.142    | 0.254             | 14                               | 0.202    | 0.532             | 39                               | 0.485    | 1.776             | 16                               | 0.437    | 1.21              | 91                               | 1.496    | 4.195             |
| AS11 | 5                                | 0.103    | 0.165             | 13                               | 0.498    | 1.276             | 4                                | 0.524    | 0.726             | 2                                | 0.113    | 0.078             | 12                               | 0.725    | 1.801             | 16                               | 0.578    | 1.603             | 13                               | 0.551    | 1.414             | 65                               | 3.092    | 7.063             |
| AS12 | 3                                | 0.391    | 0.43              | 9                                | 0.293    | 0.643             | 5                                | 0.351    | 0.565             | 3                                | 0.036    | 0.04              | 7                                | 0.33     | 0.642             | 3                                | 0.422    | 0.464             | 7                                | 0.253    | 0.491             | 37                               | 2.076    | 3.275             |
| AS18 | 5                                | 0.107    | 0.173             | 9                                | 0.406    | 0.891             | 7                                | 0.158    | 0.308             | 3                                | 0.135    | 0.148             | 16                               | 0.303    | 0.841             | 40                               | 0.561    | 2.069             | 16                               | 0.307    | 0.85              | 96                               | 1.977    | 5.28              |
| AS19 | 4                                | 0.095    | 0.132             | 14                               | 0.406    | 1.072             | 26                               | 0.53     | 1.727             | 7                                | 0.268    | 0.521             | 22                               | 0.519    | 1.603             | 65                               | 0.661    | 2.76              | 24                               | 0.497    | 1.578             | 162                              | 2.976    | 9.393             |
| AS22 | 5                                | 0.074    | 0.119             | 10                               | 0.159    | 0.367             | 7                                | 0.249    | 0.484             | 3                                | 0.033    | 0.036             | 12                               | 0.278    | 0.692             | 11                               | 0.167    | 0.401             | 13                               | 0.236    | 0.604             | 61                               | 1.196    | 2.703             |
| MO1  | 7                                | 0.207    | 0.402             | 6                                | 0.259    | 0.465             | 43                               | 0.813    | 3.059             | 6                                | 0.311    | 0.557             | 11                               | 0.342    | 0.821             | 25                               | 0.5      | 1.608             | 30                               | 0.412    | 1.401             | 128                              | 2.844    | 8.313             |
| MO4  | 1                                | 0        | 0                 | 3                                | 0.074    | 0.081             | 12                               | 0.23     | 0.571             | 3                                | 0.128    | 0.14              | 8                                | 0.212    | 0.441             | 20                               | 0.2      | 0.599             | 13                               | 0.178    | 0.458             | 60                               | 1.022    | 2.29              |
| MO5  | 6                                | 0.467    | 0.836             | 10                               | 0.458    | 1.055             | 12                               | 0.493    | 1.224             | 9                                | 0.435    | 0.956             | 14                               | 0.494    | 1.303             | 43                               | 0.694    | 2.608             | 10                               | 0.546    | 1.257             | 104                              | 3.587    | 9.239             |
| MO6  | 2                                | 0.042    | 0.029             | 5                                | 0.061    | 0.098             | 8                                | 0.305    | 0.634             | 3                                | 0.048    | 0.052             | 6                                | 0.156    | 0.279             | 16                               | 0.238    | 0.659             | 14                               | 0.337    | 0.89              | 54                               | 1.187    | 2.641             |
